# Supplementary material for: New Variants Including ARG1 Polymorphisms Associated with C-Reactive Protein Levels Identified by Genome-Wide Association and Pathway Analysis
Source: PubMed Central journal article supplement (PMC3999194; doi:10.1371/journal.pone.0095866), 2014-04-24
Supplement: pone.0095866.s001.pdf [file pone.0095866.s001.pdf]

## Supplementary Data

**New Variants including *ARG1* polymorphisms associated with C-reactive protein levels**

**identified by genome-wide association and pathway analysis**

Nadimuthu Vinayagamoorthy<sup>1,2</sup>, Hae-Jin Hu<sup>1,2</sup>, Seon-Hee Yim<sup>1,3</sup>, Seung-Hyun Jung<sup>1,2</sup>,  
Jaeseong Jo<sup>4</sup>, Sun Ha Jee<sup>4</sup> and Yeun-Jun Chung<sup>1,2,\*</sup>

<sup>1</sup>Integrated Research Center for Genome Polymorphism, <sup>2</sup>Department of Microbiology, <sup>3</sup>Department of Medical Education, The Catholic University of Korea, College of Medicine, 222 Banpo-daero, Seocho-gu, Seoul, 137-701, Korea; <sup>4</sup>Institute of Health Promotion, Graduate School of Public Health, Yonsei University, Seoul, 120-749, Korea

### Supplementary Tables

**Table S1.** Characteristics of the subjects in stage 1 and 2 data.

|                           | <b>Stage 1</b> | <b>Stage 2</b> |
|---------------------------|----------------|----------------|
| N                         | 7626           | 903            |
| Age (years)*              | 52.5±8.6       | 41.8±8.6       |
| Male (%)                  | 3586(47.0)     | 518 (57.4)     |
| BMI (kg/m <sup>2</sup> )* | 24.6±3.1       | 23.7±3.2       |
| Smoker (%)                | 25.6           | 45.1           |
| Drinker (%)               | 53.3           | 82.9           |
| Pulse rate*               | 63.6±7.4       | 65.1±9.6       |
| CRP(mg/dL)*               | 0.2±0.45       | 0.1±0.12       |

\*Mean ± SD

**Table S2.** SNP loci associated with serum CRP levels in the stage 1 data.

| SNP*       | Locus  | Nearest Gene | Position** | Minor allele | MAF   | Median CRP level (mg/dL) |      |      | Type***   | Effect Size | SE    | P        |
|------------|--------|--------------|------------|--------------|-------|--------------------------|------|------|-----------|-------------|-------|----------|
|            |        |              |            |              |       | 11                       | 12   | 22   |           |             |       |          |
| rs7553007  | 1q23.2 | <i>CRP</i>   | 157965173  | G            | 0.369 | 0.17                     | 0.15 | 0.13 | genotyped | 0.182       | 0.023 | 7.34E-16 |
| rs1205     | 1q23.2 | <i>CRP</i>   | 157948857  | C            | 0.364 | 0.17                     | 0.15 | 0.13 | imputed   | 0.181       | 0.023 | 2.21E-15 |
| rs2808629  | 1q23.2 | <i>CRP</i>   | 157943420  | G            | 0.363 | 0.17                     | 0.15 | 0.13 | imputed   | 0.181       | 0.023 | 2.50E-15 |
| rs2794520  | 1q23.2 | <i>CRP</i>   | 157945440  | C            | 0.364 | 0.17                     | 0.15 | 0.13 | imputed   | 0.181       | 0.023 | 2.82E-15 |
| rs2808628  | 1q23.2 | <i>CRP</i>   | 157942635  | G            | 0.360 | 0.17                     | 0.15 | 0.13 | imputed   | 0.182       | 0.023 | 3.43E-15 |
| rs876537   | 1q23.2 | <i>CRP</i>   | 157941557  | C            | 0.359 | 0.17                     | 0.15 | 0.13 | imputed   | 0.182       | 0.023 | 3.61E-15 |
| rs2027471  | 1q23.2 | <i>CRP</i>   | 157956012  | T            | 0.344 | 0.17                     | 0.15 | 0.13 | imputed   | 0.171       | 0.023 | 2.30E-13 |
| rs1341665  | 1q23.2 | <i>CRP</i>   | 157958183  | G            | 0.344 | 0.17                     | 0.15 | 0.13 | imputed   | 0.17        | 0.023 | 2.98E-13 |
| rs16842599 | 1q23.2 | <i>CRP</i>   | 157964099  | C            | 0.140 | 0.18                     | 0.16 | 0.13 | imputed   | 0.199       | 0.031 | 2.39E-10 |
| rs16842559 | 1q23.2 | <i>CRP</i>   | 157942795  | C            | 0.140 | 0.18                     | 0.16 | 0.13 | imputed   | 0.199       | 0.031 | 2.54E-10 |
| rs16842568 | 1q23.2 | <i>CRP</i>   | 157942844  | G            | 0.140 | 0.18                     | 0.16 | 0.13 | imputed   | 0.199       | 0.031 | 2.54E-10 |
| rs12081480 | 1q23.2 | <i>CRP</i>   | 157973614  | G            | 0.140 | 0.18                     | 0.16 | 0.13 | imputed   | 0.199       | 0.032 | 2.96E-10 |
| rs12081252 | 1q23.2 | <i>CRP</i>   | 157973137  | C            | 0.140 | 0.18                     | 0.16 | 0.13 | imputed   | 0.198       | 0.031 | 3.28E-10 |
| rs12068753 | 1q23.2 | <i>CRP</i>   | 157959161  | A            | 0.140 | 0.18                     | 0.16 | 0.13 | genotyped | 0.197       | 0.031 | 3.41E-10 |
| rs12081264 | 1q23.2 | <i>CRP</i>   | 157973184  | C            | 0.140 | 0.18                     | 0.16 | 0.13 | imputed   | 0.197       | 0.031 | 3.81E-10 |
| rs3093075  | 1q23.2 | <i>CRP</i>   | 157946537  | T            | 0.145 | 0.19                     | 0.16 | 0.13 | imputed   | 0.190       | 0.031 | 8.66E-10 |
| rs3093077  | 1q23.2 | <i>CRP</i>   | 157946260  | C            | 0.145 | 0.19                     | 0.16 | 0.13 | genotyped | 0.190       | 0.031 | 9.30E-10 |
| rs16842502 | 1q23.2 | <i>CRP</i>   | 157920487  | A            | 0.140 | 0.18                     | 0.16 | 0.13 | imputed   | 0.184       | 0.032 | 7.80E-09 |
| rs2794526  | 1q23.2 | <i>CRP</i>   | 157892102  | A            | 0.125 | 0.18                     | 0.16 | 0.14 | imputed   | 0.172       | 0.033 | 1.79E-07 |

|            |        |               |           |   |       |      |      |      |           |        |       |          |
|------------|--------|---------------|-----------|---|-------|------|------|------|-----------|--------|-------|----------|
| rs4275453  | 1q23.2 | <i>CRP</i>    | 157974671 | C | 0.255 | 0.17 | 0.15 | 0.13 | imputed   | 0.132  | 0.025 | 2.06E-07 |
| rs1446976  | 1q23.2 | <i>CRP</i>    | 157895818 | G | 0.125 | 0.18 | 0.16 | 0.14 | imputed   | 0.170  | 0.033 | 2.32E-07 |
| rs1446975  | 1q23.2 | <i>CRP</i>    | 157895966 | C | 0.125 | 0.18 | 0.16 | 0.14 | imputed   | 0.170  | 0.033 | 2.32E-07 |
| rs1891186  | 1q23.2 | <i>CRP</i>    | 157895645 | G | 0.126 | 0.18 | 0.16 | 0.13 | imputed   | 0.170  | 0.033 | 2.34E-07 |
| rs1891187  | 1q23.2 | <i>CRP</i>    | 157895677 | A | 0.125 | 0.18 | 0.16 | 0.13 | imputed   | 0.170  | 0.033 | 2.34E-07 |
| rs12087465 | 1q23.2 | <i>CRP</i>    | 157891923 | A | 0.109 | 0.17 | 0.16 | 0.14 | imputed   | 0.178  | 0.035 | 4.17E-07 |
| rs2794500  | 1q23.2 | <i>CRP</i>    | 157901645 | T | 0.125 | 0.18 | 0.16 | 0.13 | genotyped | 0.162  | 0.033 | 7.94E-07 |
| rs1841972  | 5q23.2 | <i>SNCAIP</i> | 121824037 | G | 0.226 | 0.15 | 0.14 | 0.14 | genotyped | 0.121  | 0.026 | 4.87E-06 |
| rs10478555 | 5q23.2 | <i>SNCAIP</i> | 121809430 | T | 0.222 | 0.15 | 0.14 | 0.14 | imputed   | 0.121  | 0.027 | 6.78E-06 |
| rs12517578 | 5q21.3 | <i>EFNA5</i>  | 106008730 | G | 0.355 | 0.12 | 0.14 | 0.14 | genotyped | -0.102 | 0.023 | 6.98E-06 |
| rs2608951  | 6q23.2 | <i>ARG1</i>   | 131825473 | G | 0.120 | 0.13 | 0.13 | 0.14 | genotyped | -0.174 | 0.033 | 1.96E-07 |
| rs9483280  | 6q23.2 | <i>ARG1</i>   | 131798329 | G | 0.115 | 0.13 | 0.13 | 0.14 | imputed   | -0.177 | 0.034 | 2.02E-07 |
| rs9402328  | 6q23.2 | <i>ARG1</i>   | 131798744 | C | 0.115 | 0.13 | 0.13 | 0.14 | imputed   | -0.177 | 0.034 | 2.02E-07 |
| rs2143779  | 6q23.2 | <i>ARG1</i>   | 131800478 | T | 0.115 | 0.13 | 0.13 | 0.14 | imputed   | -0.177 | 0.034 | 2.05E-07 |
| rs9492976  | 6q23.2 | <i>ARG1</i>   | 131797691 | A | 0.115 | 0.13 | 0.13 | 0.14 | imputed   | -0.177 | 0.034 | 2.06E-07 |
| rs2179771  | 6q23.2 | <i>ARG1</i>   | 131796623 | C | 0.115 | 0.13 | 0.13 | 0.14 | imputed   | -0.177 | 0.034 | 2.14E-07 |
| rs9375813  | 6q23.2 | <i>ARG1</i>   | 131798940 | A | 0.115 | 0.13 | 0.13 | 0.14 | genotyped | -0.177 | 0.034 | 2.30E-07 |
| rs9483281  | 6q23.2 | <i>ARG1</i>   | 131806872 | A | 0.115 | 0.13 | 0.13 | 0.14 | imputed   | -0.176 | 0.034 | 2.31E-07 |
| rs2608928  | 6q23.2 | <i>ARG1</i>   | 131833564 | A | 0.119 | 0.13 | 0.13 | 0.14 | imputed   | -0.173 | 0.034 | 2.54E-07 |
| rs2491204  | 6q23.2 | <i>ARG1</i>   | 131839097 | T | 0.119 | 0.13 | 0.13 | 0.14 | imputed   | -0.173 | 0.034 | 2.69E-07 |
| rs9321294  | 6q23.2 | <i>ARG1</i>   | 131837250 | T | 0.119 | 0.13 | 0.13 | 0.14 | imputed   | -0.173 | 0.034 | 2.75E-07 |
| rs2608927  | 6q23.2 | <i>ARG1</i>   | 131835736 | T | 0.119 | 0.13 | 0.13 | 0.14 | imputed   | -0.172 | 0.034 | 2.80E-07 |

|           |        |             |           |   |       |      |      |      |           |        |       |          |
|-----------|--------|-------------|-----------|---|-------|------|------|------|-----------|--------|-------|----------|
| rs6904726 | 6q23.2 | <i>ARG1</i> | 131810390 | A | 0.115 | 0.13 | 0.13 | 0.14 | imputed   | -0.174 | 0.034 | 3.26E-07 |
| rs6904733 | 6q23.2 | <i>ARG1</i> | 131810402 | T | 0.115 | 0.13 | 0.13 | 0.14 | imputed   | -0.174 | 0.034 | 3.26E-07 |
| rs6927792 | 6q23.2 | <i>ARG1</i> | 131810800 | C | 0.115 | 0.13 | 0.13 | 0.14 | imputed   | -0.174 | 0.034 | 3.26E-07 |
| rs2608935 | 6q23.2 | <i>ARG1</i> | 131831429 | A | 0.117 | 0.13 | 0.13 | 0.14 | genotyped | -0.171 | 0.034 | 3.68E-07 |
| rs9492992 | 6q23.2 | <i>ARG1</i> | 131844120 | T | 0.151 | 0.13 | 0.13 | 0.14 | genotyped | -0.15  | 0.03  | 6.88E-07 |
| rs9493000 | 6q23.2 | <i>ARG1</i> | 131850284 | C | 0.150 | 0.13 | 0.13 | 0.14 | imputed   | -0.149 | 0.03  | 8.41E-07 |
| rs7740929 | 6q23.2 | <i>ARG1</i> | 131850315 | G | 0.150 | 0.13 | 0.13 | 0.14 | imputed   | -0.149 | 0.03  | 8.41E-07 |
| rs3861462 | 6q23.2 | <i>ARG1</i> | 131851129 | C | 0.150 | 0.13 | 0.13 | 0.14 | imputed   | -0.148 | 0.03  | 1.04E-06 |
| rs2608913 | 6q23.2 | <i>ARG1</i> | 131911954 | C | 0.309 | 0.14 | 0.13 | 0.14 | imputed   | -0.11  | 0.024 | 3.76E-06 |
| rs2807272 | 6q23.2 | <i>ARG1</i> | 131832938 | T | 0.109 | 0.14 | 0.13 | 0.14 | imputed   | -0.157 | 0.035 | 6.30E-06 |
| rs2608917 | 6q23.2 | <i>ARG1</i> | 131913649 | G | 0.312 | 0.14 | 0.13 | 0.14 | imputed   | -0.107 | 0.024 | 6.93E-06 |
| rs2807273 | 6q23.2 | <i>ARG1</i> | 131834214 | G | 0.109 | 0.14 | 0.13 | 0.14 | imputed   | -0.156 | 0.035 | 7.10E-06 |
| rs2446213 | 6q23.2 | <i>ARG1</i> | 131915724 | C | 0.312 | 0.14 | 0.14 | 0.14 | genotyped | -0.106 | 0.024 | 7.55E-06 |
| rs2491209 | 6q23.2 | <i>ARG1</i> | 131822823 | A | 0.110 | 0.14 | 0.13 | 0.14 | imputed   | -0.158 | 0.035 | 7.82E-06 |
| rs2608919 | 6q23.2 | <i>ARG1</i> | 131915028 | T | 0.312 | 0.14 | 0.14 | 0.14 | imputed   | -0.106 | 0.024 | 7.89E-06 |
| rs2608921 | 6q23.2 | <i>ARG1</i> | 131915428 | T | 0.312 | 0.14 | 0.14 | 0.14 | imputed   | -0.106 | 0.024 | 7.89E-06 |
| rs2608915 | 6q23.2 | <i>ARG1</i> | 131913007 | G | 0.312 | 0.14 | 0.14 | 0.14 | imputed   | -0.106 | 0.024 | 7.93E-06 |
| rs2608916 | 6q23.2 | <i>ARG1</i> | 131913298 | G | 0.312 | 0.14 | 0.14 | 0.14 | imputed   | -0.106 | 0.024 | 7.93E-06 |
| rs2608918 | 6q23.2 | <i>ARG1</i> | 131914585 | T | 0.312 | 0.14 | 0.14 | 0.14 | imputed   | -0.106 | 0.024 | 7.93E-06 |
| rs2608912 | 6q23.2 | <i>ARG1</i> | 131911476 | C | 0.312 | 0.14 | 0.14 | 0.14 | genotyped | -0.106 | 0.024 | 7.94E-06 |
| rs2608914 | 6q23.2 | <i>ARG1</i> | 131912304 | A | 0.312 | 0.14 | 0.14 | 0.14 | imputed   | -0.106 | 0.024 | 7.94E-06 |
| rs2608982 | 6q23.2 | <i>ARG1</i> | 131917893 | T | 0.312 | 0.14 | 0.14 | 0.14 | imputed   | -0.105 | 0.024 | 8.52E-06 |

|            |          |                  |           |   |       |      |      |      |           |        |       |          |
|------------|----------|------------------|-----------|---|-------|------|------|------|-----------|--------|-------|----------|
| rs2781650  | 6q23.2   | <i>ARG1</i>      | 131918414 | G | 0.312 | 0.14 | 0.14 | 0.14 | imputed   | -0.105 | 0.024 | 8.52E-06 |
| rs2781651  | 6q23.2   | <i>ARG1</i>      | 131918636 | G | 0.312 | 0.14 | 0.14 | 0.14 | imputed   | -0.105 | 0.024 | 8.52E-06 |
| rs2749933  | 6q23.2   | <i>ARG1</i>      | 131918926 | T | 0.312 | 0.14 | 0.14 | 0.14 | imputed   | -0.105 | 0.024 | 8.52E-06 |
| rs2608976  | 6q23.2   | <i>ARG1</i>      | 131919868 | C | 0.312 | 0.14 | 0.14 | 0.14 | imputed   | -0.105 | 0.024 | 8.52E-06 |
| rs4443525  | 6q23.2   | <i>ARG1</i>      | 131839960 | A | 0.109 | 0.14 | 0.13 | 0.14 | imputed   | -0.155 | 0.035 | 8.64E-06 |
| rs2608940  | 6q23.2   | <i>ARG1</i>      | 131840624 | T | 0.109 | 0.14 | 0.13 | 0.14 | imputed   | -0.155 | 0.035 | 8.64E-06 |
| rs2062375  | 8q24.12  | <i>TNFRSF11B</i> | 120046973 | G | 0.271 | 0.16 | 0.15 | 0.13 | imputed   | 0.113  | 0.025 | 5.22E-06 |
| rs9969672  | 8q24.12  | <i>TNFRSF11B</i> | 120075261 | T | 0.268 | 0.15 | 0.15 | 0.13 | imputed   | 0.113  | 0.025 | 6.29E-06 |
| rs7014574  | 8q24.12  | <i>TNFRSF11B</i> | 120046258 | C | 0.268 | 0.15 | 0.15 | 0.13 | genotyped | 0.111  | 0.025 | 6.78E-06 |
| rs11992136 | 8q24.12  | <i>TNFRSF11B</i> | 120072908 | C | 0.268 | 0.15 | 0.15 | 0.13 | imputed   | 0.113  | 0.025 | 6.92E-06 |
| rs2062377  | 8q24.12  | <i>TNFRSF11B</i> | 120076601 | T | 0.271 | 0.15 | 0.15 | 0.13 | imputed   | 0.11   | 0.025 | 9.85E-06 |
| rs796126   | 10p11.22 | <i>ARHGAP12</i>  | 32008765  | T | 0.364 | 0.13 | 0.14 | 0.15 | genotyped | -0.109 | 0.023 | 1.76E-06 |
| rs796127   | 10p11.22 | <i>ARHGAP12</i>  | 32008735  | T | 0.364 | 0.13 | 0.14 | 0.15 | genotyped | -0.109 | 0.023 | 1.95E-06 |
| rs2488384  | 10p11.22 | <i>ARHGAP12</i>  | 32013773  | T | 0.371 | 0.13 | 0.14 | 0.15 | imputed   | -0.11  | 0.023 | 2.20E-06 |
| rs1775437  | 10p11.22 | <i>ARHGAP12</i>  | 32004232  | T | 0.359 | 0.13 | 0.14 | 0.15 | imputed   | -0.108 | 0.023 | 2.35E-06 |
| rs796130   | 10p11.22 | <i>ARHGAP12</i>  | 32006513  | G | 0.360 | 0.13 | 0.14 | 0.15 | genotyped | -0.107 | 0.023 | 2.97E-06 |
| rs796082   | 10p11.22 | <i>ZEB1</i>      | 31960297  | G | 0.360 | 0.13 | 0.14 | 0.15 | imputed   | -0.102 | 0.023 | 9.24E-06 |
| rs1169310  | 12q24.31 | <i>HNFI1A</i>    | 119923816 | G | 0.443 | 0.16 | 0.14 | 0.13 | imputed   | 0.121  | 0.022 | 4.95E-08 |
| rs1169306  | 12q24.31 | <i>HNFI1A</i>    | 119922694 | C | 0.444 | 0.16 | 0.14 | 0.13 | imputed   | 0.121  | 0.022 | 5.15E-08 |
| rs735396   | 12q24.31 | <i>HNFI1A</i>    | 119923227 | T | 0.444 | 0.16 | 0.14 | 0.13 | imputed   | 0.121  | 0.022 | 5.34E-08 |
| rs2464195  | 12q24.31 | <i>HNFI1A</i>    | 119919858 | G | 0.444 | 0.16 | 0.14 | 0.13 | imputed   | 0.121  | 0.022 | 5.83E-08 |
| rs1169313  | 12q24.31 | <i>CI2orf43</i>  | 119927053 | T | 0.446 | 0.16 | 0.14 | 0.13 | genotyped | 0.119  | 0.022 | 6.66E-08 |

|            |          |                 |           |   |       |      |      |      |           |        |       |          |
|------------|----------|-----------------|-----------|---|-------|------|------|------|-----------|--------|-------|----------|
| rs2259816  | 12q24.31 | <i>HNF1A</i>    | 119919970 | G | 0.446 | 0.16 | 0.14 | 0.13 | genotyped | 0.119  | 0.022 | 7.10E-08 |
| rs2259820  | 12q24.31 | <i>HNF1A</i>    | 119919725 | C | 0.446 | 0.16 | 0.14 | 0.13 | imputed   | 0.119  | 0.022 | 8.58E-08 |
| rs2464196  | 12q24.31 | <i>HNF1A</i>    | 119919810 | G | 0.446 | 0.16 | 0.14 | 0.13 | imputed   | 0.119  | 0.022 | 8.58E-08 |
| rs2393791  | 12q24.31 | <i>HNF1A</i>    | 119908339 | C | 0.480 | 0.12 | 0.14 | 0.16 | genotyped | -0.118 | 0.022 | 8.89E-08 |
| rs7310409  | 12q24.31 | <i>HNF1A</i>    | 119909244 | A | 0.479 | 0.12 | 0.14 | 0.16 | imputed   | -0.116 | 0.022 | 1.38E-07 |
| rs2393775  | 12q24.31 | <i>HNF1A</i>    | 119908957 | G | 0.482 | 0.12 | 0.14 | 0.16 | imputed   | -0.116 | 0.022 | 1.75E-07 |
| rs1182933  | 12q24.31 | <i>CI2orf43</i> | 119939005 | C | 0.452 | 0.16 | 0.14 | 0.13 | imputed   | 0.114  | 0.022 | 4.05E-07 |
| rs2708101  | 12q24.31 | <i>OASL</i>     | 119972015 | C | 0.482 | 0.16 | 0.14 | 0.13 | genotyped | 0.106  | 0.022 | 1.36E-06 |
| rs1920792  | 12q24.31 | <i>HNF1A</i>    | 119888967 | C | 0.468 | 0.16 | 0.14 | 0.13 | imputed   | 0.099  | 0.022 | 6.35E-06 |
| rs7305618  | 12q24.31 | <i>HNF1A</i>    | 119887315 | T | 0.468 | 0.16 | 0.14 | 0.13 | imputed   | 0.099  | 0.022 | 6.86E-06 |
| rs1169303  | 12q24.31 | <i>HNF1A</i>    | 119920759 | A | 0.245 | 0.17 | 0.14 | 0.13 | imputed   | 0.114  | 0.026 | 9.47E-06 |
| rs7953249  | 12q24.31 | <i>HNF1A</i>    | 119888107 | A | 0.469 | 0.16 | 0.14 | 0.13 | genotyped | 0.097  | 0.022 | 9.85E-06 |
| rs17596685 | 13q14.11 | <i>TNFSF11</i>  | 42015201  | T | 0.352 | 0.13 | 0.14 | 0.14 | genotyped | -0.102 | 0.023 | 6.69E-06 |

\*98 SNP loci with unadjusted  $P$  value  $< 10^{-5}$  were presented; \*\* Positions of the SNPs were based on NCBI human genome build 36.3 (hg18);

\*\*\* Type indicates if a SNP is genotype or imputed; Chr, chromosome; MAF, minor allele frequency; CRP, C-reactive protein; SE, standard error;

**Table S3.** SNP loci associated with serum CRP levels in the stage 2 data and meta-analysis.

| SNP*       | Nearest gene  | Locus  | Position  | Minor allele | Stage 2        |          | Meta-analysis |          | Q     | I <sup>2</sup> |
|------------|---------------|--------|-----------|--------------|----------------|----------|---------------|----------|-------|----------------|
|            |               |        |           |              | $\beta$ (SE)   | P        | $\beta$       | P        |       |                |
| rs7553007  | <i>CRP</i>    | 1q23.2 | 157965173 | G            | 0.099 (0.042)  | 1.93E-02 | 0.164         | 1.72E-16 | 0.085 | 66.23          |
| rs1205     | <i>CRP</i>    | 1q23.2 | 157948857 | C            | 0.099 (0.043)  | 2.07E-02 | 0.163         | 5.09E-16 | 0.093 | 64.63          |
| rs2808629  | <i>CRP</i>    | 1q23.2 | 157943420 | G            | 0.098 (0.043)  | 2.30E-02 | 0.163         | 6.64E-16 | 0.088 | 65.72          |
| rs2794520  | <i>CRP</i>    | 1q23.2 | 157945440 | C            | 0.098 (0.043)  | 2.30E-02 | 0.162         | 7.39E-16 | 0.089 | 65.52          |
| rs2808628  | <i>CRP</i>    | 1q23.2 | 157942635 | G            | 0.100 (0.043)  | 2.00E-02 | 0.164         | 7.50E-16 | 0.097 | 63.73          |
| rs876537   | <i>CRP</i>    | 1q23.2 | 157941557 | C            | 0.094 (0.043)  | 3.17E-02 | 0.163         | 1.49E-15 | 0.072 | 69.15          |
| rs1341665  | <i>CRP</i>    | 1q23.2 | 157958183 | G            | 0.103 (0.043)  | 1.72E-02 | 0.155         | 3.76E-14 | 0.176 | 45.42          |
| rs2027471  | <i>CRP</i>    | 1q23.2 | 157956012 | T            | 0.100 (0.043)  | 2.12E-02 | 0.155         | 3.92E-14 | 0.151 | 51.52          |
| rs16842599 | <i>CRP</i>    | 1q23.2 | 157964099 | C            | 0.182 (0.058)  | 1.78E-03 | 0.195         | 1.55E-12 | 0.791 | 0              |
| rs12081480 | <i>CRP</i>    | 1q23.2 | 157973614 | G            | 0.182 (0.058)  | 1.80E-03 | 0.195         | 1.90E-12 | 0.795 | 0              |
| rs16842559 | <i>CRP</i>    | 1q23.2 | 157942795 | C            | 0.179 (0.058)  | 2.17E-03 | 0.194         | 1.99E-12 | 0.758 | 0              |
| rs16842568 | <i>CRP</i>    | 1q23.2 | 157942844 | G            | 0.179 (0.058)  | 2.17E-03 | 0.194         | 1.99E-12 | 0.758 | 0              |
| rs12081252 | <i>CRP</i>    | 1q23.2 | 157973137 | C            | 0.182 (0.058)  | 1.78E-03 | 0.194         | 2.10E-12 | 0.805 | 0              |
| rs12068753 | <i>CRP</i>    | 1q23.2 | 157959161 | A            | 0.182 (0.058)  | 1.78E-03 | 0.194         | 2.18E-12 | 0.813 | 0              |
| rs12081264 | <i>CRP</i>    | 1q23.2 | 157973184 | C            | 0.182 (0.058)  | 1.78E-03 | 0.194         | 2.42E-12 | 0.813 | 0              |
| rs3093075  | <i>CRP</i>    | 1q23.2 | 157946537 | T            | 0.167 (0.058)  | 3.76E-03 | 0.185         | 1.15E-11 | 0.728 | 0              |
| rs3093077  | <i>CRP</i>    | 1q23.2 | 157946260 | C            | 0.168 (0.057)  | 3.57E-03 | 0.185         | 1.18E-11 | 0.736 | 0              |
| rs16842502 | <i>CRP</i>    | 1q23.2 | 157920487 | A            | 0.171 (0.058)  | 3.57E-03 | 0.181         | 9.62E-11 | 0.841 | 0              |
| rs4275453  | <i>CRP</i>    | 1q23.2 | 157974671 | C            | 0.124 (0.046)  | 7.90E-03 | 0.130         | 5.26E-09 | 0.871 | 0              |
| rs12517578 | <i>EFNA5</i>  | 5q21.3 | 106008730 | G            | -0.005 (0.044) | 9.10E-01 | -0.082        | 5.21E-05 | 0.048 | 74.34          |
| rs1841972  | <i>SNCAIP</i> | 5q23.2 | 121824037 | G            | -0.025 (0.049) | 6.04E-01 | 0.088         | 1.61E-04 | 0.008 | 85.63          |
| rs10478555 | <i>SNCAIP</i> | 5q23.2 | 121809430 | T            | -0.021 (0.049) | 6.76E-01 | 0.088         | 1.77E-04 | 0.011 | 84.39          |

|           |             |        |           |   |                |          |        |          |       |       |
|-----------|-------------|--------|-----------|---|----------------|----------|--------|----------|-------|-------|
| rs9375813 | <i>ARG1</i> | 6q23.2 | 131798940 | A | -0.132 (0.063) | 3.73E-02 | -0.167 | 2.85E-08 | 0.538 | 0     |
| rs9483280 | <i>ARG1</i> | 6q23.2 | 131798329 | G | -0.127 (0.063) | 4.40E-02 | -0.166 | 3.08E-08 | 0.486 | 0     |
| rs9402328 | <i>ARG1</i> | 6q23.2 | 131798744 | C | -0.127 (0.063) | 4.40E-02 | -0.166 | 3.08E-08 | 0.486 | 0     |
| rs9492976 | <i>ARG1</i> | 6q23.2 | 131797691 | A | -0.127 (0.063) | 4.40E-02 | -0.166 | 3.13E-08 | 0.486 | 0     |
| rs2143779 | <i>ARG1</i> | 6q23.2 | 131800478 | T | -0.125 (0.063) | 4.73E-02 | -0.165 | 3.41E-08 | 0.467 | 0     |
| rs2179771 | <i>ARG1</i> | 6q23.2 | 131796623 | C | -0.124 (0.063) | 4.92E-02 | -0.165 | 3.72E-08 | 0.465 | 0     |
| rs9483281 | <i>ARG1</i> | 6q23.2 | 131806872 | A | -0.117 (0.063) | 6.35E-02 | -0.163 | 5.35E-08 | 0.406 | 0     |
| rs2608951 | <i>ARG1</i> | 6q23.2 | 131825473 | G | -0.110 (0.062) | 7.74E-02 | -0.159 | 5.79E-08 | 0.361 | 0     |
| rs2608928 | <i>ARG1</i> | 6q23.2 | 131833564 | A | -0.114 (0.062) | 6.76E-02 | -0.160 | 6.27E-08 | 0.406 | 0     |
| rs2608935 | <i>ARG1</i> | 6q23.2 | 131831429 | A | -0.122 (0.063) | 5.32E-02 | -0.160 | 6.56E-08 | 0.490 | 0     |
| rs9321294 | <i>ARG1</i> | 6q23.2 | 131837250 | T | -0.114 (0.062) | 6.76E-02 | -0.159 | 6.70E-08 | 0.410 | 0     |
| rs2491204 | <i>ARG1</i> | 6q23.2 | 131839097 | T | -0.114 (0.062) | 6.95E-02 | -0.159 | 6.73E-08 | 0.404 | 0     |
| rs2608927 | <i>ARG1</i> | 6q23.2 | 131835736 | T | -0.114 (0.062) | 6.76E-02 | -0.159 | 6.85E-08 | 0.411 | 0     |
| rs6904726 | <i>ARG1</i> | 6q23.2 | 131810390 | A | -0.111 (0.063) | 7.81E-02 | -0.160 | 9.44E-08 | 0.380 | 0     |
| rs6904733 | <i>ARG1</i> | 6q23.2 | 131810402 | T | -0.111 (0.063) | 7.87E-02 | -0.160 | 9.54E-08 | 0.379 | 0     |
| rs6927792 | <i>ARG1</i> | 6q23.2 | 131810800 | C | -0.111 (0.063) | 7.87E-02 | -0.160 | 9.54E-08 | 0.379 | 0     |
| rs2807272 | <i>ARG1</i> | 6q23.2 | 131832938 | T | -0.117 (0.064) | 6.95E-02 | -0.148 | 1.30E-06 | 0.576 | 0     |
| rs2807273 | <i>ARG1</i> | 6q23.2 | 131834214 | G | -0.117 (0.064) | 6.95E-02 | -0.147 | 1.45E-06 | 0.584 | 0     |
| rs4443525 | <i>ARG1</i> | 6q23.2 | 131839960 | A | -0.116 (0.064) | 7.14E-02 | -0.146 | 1.79E-06 | 0.591 | 0     |
| rs2608940 | <i>ARG1</i> | 6q23.2 | 131840624 | T | -0.116 (0.064) | 7.14E-02 | -0.146 | 1.79E-06 | 0.591 | 0     |
| rs2491209 | <i>ARG1</i> | 6q23.2 | 131822823 | A | -0.093 (0.066) | 1.58E-01 | -0.144 | 4.01E-06 | 0.387 | 0     |
| rs3861462 | <i>ARG1</i> | 6q23.2 | 131851129 | C | -0.034 (0.058) | 5.57E-01 | -0.124 | 4.06E-06 | 0.083 | 66.84 |
| rs9493000 | <i>ARG1</i> | 6q23.2 | 131850284 | C | -0.027 (0.058) | 6.43E-01 | -0.123 | 4.56E-06 | 0.060 | 71.66 |
| rs7740929 | <i>ARG1</i> | 6q23.2 | 131850315 | G | -0.027 (0.058) | 6.43E-01 | -0.123 | 4.56E-06 | 0.060 | 71.66 |
| rs9492992 | <i>ARG1</i> | 6q23.2 | 131844120 | T | -0.002 (0.057) | 9.74E-01 | -0.118 | 1.05E-05 | 0.022 | 81.07 |
| rs2608913 | <i>ARG1</i> | 6q23.2 | 131911954 | C | -0.019 (0.043) | 6.64E-01 | -0.089 | 2.00E-05 | 0.063 | 70.98 |



|            |                  |          |           |   |                |          |        |          |       |       |
|------------|------------------|----------|-----------|---|----------------|----------|--------|----------|-------|-------|
| rs2446213  | <i>ARG1</i>      | 6q23.2   | 131915724 | C | -0.012 (0.043) | 7.75E-01 | -0.084 | 4.75E-05 | 0.057 | 72.4  |
| rs2608917  | <i>ARG1</i>      | 6q23.2   | 131913649 | G | -0.011 (0.043) | 8.04E-01 | -0.084 | 4.76E-05 | 0.052 | 73.55 |
| rs2608919  | <i>ARG1</i>      | 6q23.2   | 131915028 | T | -0.012 (0.043) | 7.75E-01 | -0.084 | 4.91E-05 | 0.058 | 72.28 |
| rs2608921  | <i>ARG1</i>      | 6q23.2   | 131915428 | T | -0.012 (0.043) | 7.75E-01 | -0.084 | 4.91E-05 | 0.058 | 72.28 |
| rs2608915  | <i>ARG1</i>      | 6q23.2   | 131913007 | G | -0.012 (0.043) | 7.80E-01 | -0.084 | 4.96E-05 | 0.057 | 72.39 |
| rs2608916  | <i>ARG1</i>      | 6q23.2   | 131913298 | G | -0.012 (0.043) | 7.80E-01 | -0.084 | 4.96E-05 | 0.057 | 72.39 |
| rs2608918  | <i>ARG1</i>      | 6q23.2   | 131914585 | T | -0.012 (0.043) | 7.80E-01 | -0.084 | 4.96E-05 | 0.057 | 72.39 |
| rs2608912  | <i>ARG1</i>      | 6q23.2   | 131911476 | C | -0.012 (0.043) | 7.84E-01 | -0.084 | 5.10E-05 | 0.057 | 72.5  |
| rs2608914  | <i>ARG1</i>      | 6q23.2   | 131912304 | A | -0.012 (0.043) | 7.84E-01 | -0.084 | 5.10E-05 | 0.057 | 72.5  |
| rs2608982  | <i>ARG1</i>      | 6q23.2   | 131917893 | T | -0.012 (0.043) | 7.75E-01 | -0.084 | 5.23E-05 | 0.059 | 72.04 |
| rs2781650  | <i>ARG1</i>      | 6q23.2   | 131918414 | G | -0.012 (0.043) | 7.75E-01 | -0.084 | 5.23E-05 | 0.059 | 72.04 |
| rs2781651  | <i>ARG1</i>      | 6q23.2   | 131918636 | G | -0.012 (0.043) | 7.75E-01 | -0.084 | 5.23E-05 | 0.059 | 72.04 |
| rs2749933  | <i>ARG1</i>      | 6q23.2   | 131918926 | T | -0.012 (0.043) | 7.75E-01 | -0.084 | 5.23E-05 | 0.059 | 72.04 |
| rs2608976  | <i>ARG1</i>      | 6q23.2   | 131919868 | C | -0.012 (0.043) | 7.75E-01 | -0.084 | 5.23E-05 | 0.059 | 72.04 |
| rs2062375  | <i>TNFRSF11B</i> | 8q24.12  | 120046973 | G | 0.012 (0.045)  | 7.87E-01 | 0.089  | 3.77E-05 | 0.049 | 74.25 |
| rs9969672  | <i>TNFRSF11B</i> | 8q24.12  | 120075261 | T | 0.014 (0.045)  | 7.56E-01 | 0.090  | 4.17E-05 | 0.053 | 73.25 |
| rs11992136 | <i>TNFRSF11B</i> | 8q24.12  | 120072908 | C | 0.015 (0.045)  | 7.44E-01 | 0.089  | 4.35E-05 | 0.056 | 72.61 |
| rs7014574  | <i>TNFRSF11B</i> | 8q24.12  | 120046258 | C | 0.007 (0.044)  | 8.74E-01 | 0.087  | 6.06E-05 | 0.040 | 76.29 |
| rs2062377  | <i>TNFRSF11B</i> | 8q24.12  | 120076601 | T | 0.004 (0.045)  | 9.34E-01 | 0.085  | 9.39E-05 | 0.038 | 76.9  |
| rs796127   | <i>ARHGAP12</i>  | 10p11.22 | 32008735  | T | -0.041 (0.042) | 3.22E-01 | -0.093 | 3.23E-06 | 0.158 | 49.89 |
| rs796126   | <i>ARHGAP12</i>  | 10p11.22 | 32008765  | T | -0.040 (0.042) | 3.43E-01 | -0.093 | 3.26E-06 | 0.146 | 52.73 |
| rs1775437  | <i>ARHGAP12</i>  | 10p11.22 | 32004232  | T | -0.038 (0.042) | 3.59E-01 | -0.092 | 4.50E-06 | 0.143 | 53.44 |
| rs2488384  | <i>ARHGAP12</i>  | 10p11.22 | 32013773  | T | -0.035 (0.043) | 4.15E-01 | -0.093 | 5.31E-06 | 0.123 | 57.97 |
| rs796130   | <i>ARHGAP12</i>  | 10p11.22 | 32006513  | G | -0.038 (0.042) | 3.64E-01 | -0.091 | 5.64E-06 | 0.149 | 51.94 |
| rs796082   | <i>ZEB1</i>      | 10p11.22 | 31960297  | G | -0.018 (0.043) | 6.72E-01 | -0.083 | 3.91E-05 | 0.085 | 66.36 |
| rs2393791  | <i>HNF1A</i>     | 12q24.31 | 119908339 | C | -0.138 (0.041) | 8.28E-04 | -0.122 | 2.90E-10 | 0.665 | 0     |

|            |                 |          |           |   |                |          |        |          |       |   |
|------------|-----------------|----------|-----------|---|----------------|----------|--------|----------|-------|---|
| rs7310409  | <i>HNFI1A</i>   | 12q24.31 | 119909244 | A | -0.138 (0.041) | 7.79E-04 | -0.121 | 4.35E-10 | 0.641 | 0 |
| rs2393775  | <i>HNFI1A</i>   | 12q24.31 | 119908957 | G | -0.137 (0.042) | 1.08E-03 | -0.120 | 7.51E-10 | 0.647 | 0 |
| rs1169313  | <i>C12orf43</i> | 12q24.31 | 119927053 | T | 0.109 (0.041)  | 7.96E-03 | 0.117  | 1.72E-09 | 0.828 | 0 |
| rs1169310  | <i>HNFI1A</i>   | 12q24.31 | 119923816 | G | 0.104 (0.041)  | 1.08E-02 | 0.117  | 1.75E-09 | 0.716 | 0 |
| rs1169306  | <i>HNFI1A</i>   | 12q24.31 | 119922694 | C | 0.104 (0.041)  | 1.08E-02 | 0.117  | 1.84E-09 | 0.719 | 0 |
| rs735396   | <i>HNFI1A</i>   | 12q24.31 | 119923227 | T | 0.104 (0.041)  | 1.08E-02 | 0.117  | 1.91E-09 | 0.721 | 0 |
| rs2464195  | <i>HNFI1A</i>   | 12q24.31 | 119919858 | G | 0.104 (0.041)  | 1.08E-02 | 0.117  | 2.09E-09 | 0.726 | 0 |
| rs2259816  | <i>HNFI1A</i>   | 12q24.31 | 119919970 | G | 0.104 (0.041)  | 1.04E-02 | 0.116  | 2.45E-09 | 0.751 | 0 |
| rs2259820  | <i>HNFI1A</i>   | 12q24.31 | 119919725 | C | 0.097 (0.041)  | 1.79E-02 | 0.114  | 5.13E-09 | 0.630 | 0 |
| rs2464196  | <i>HNFI1A</i>   | 12q24.31 | 119919810 | G | 0.097 (0.041)  | 1.79E-02 | 0.114  | 5.13E-09 | 0.630 | 0 |
| rs1182933  | <i>C12orf43</i> | 12q24.31 | 119939005 | C | 0.093 (0.042)  | 2.72E-02 | 0.109  | 3.44E-08 | 0.656 | 0 |
| rs1920792  | <i>HNFI1A</i>   | 12q24.31 | 119888967 | C | 0.118 (0.040)  | 3.56E-03 | 0.103  | 8.12E-08 | 0.680 | 0 |
| rs7305618  | <i>HNFI1A</i>   | 12q24.31 | 119887315 | T | 0.118 (0.040)  | 3.56E-03 | 0.103  | 8.79E-08 | 0.675 | 0 |
| rs2708101  | <i>OASL</i>     | 12q24.31 | 119972015 | C | 0.091 (0.041)  | 2.51E-02 | 0.103  | 1.03E-07 | 0.750 | 0 |
| rs7953249  | <i>HNFI1A</i>   | 12q24.31 | 119888107 | A | 0.118 (0.040)  | 3.53E-03 | 0.102  | 1.27E-07 | 0.645 | 0 |
| rs1169303  | <i>HNFI1A</i>   | 12q24.31 | 119920759 | A | 0.095 (0.046)  | 3.79E-02 | 0.110  | 1.04E-06 | 0.726 | 0 |
| rs17596685 | <i>TNFSF11</i>  | 13q14.11 | 42015201  | T | -0.059 (0.043) | 1.74E-01 | -0.093 | 3.74E-06 | 0.378 | 0 |

---

\*Among the 98 SNP loci with unadjusted  $P$  value  $< 10^{-5}$  in stage 1 result, 92 available SNPs in stage 2 data were presented

**Table S4.** *P*-values and LD values of neighboring SNPs of the rs9375813 in the *ARG1* locus.

| L1        | L2         | Gene        | BP        | BETA   | SE    | P-value * | D'    | $r^2$ |
|-----------|------------|-------------|-----------|--------|-------|-----------|-------|-------|
| rs9375813 | rs17596690 | <i>ARG1</i> | 131794917 | -0.152 | 0.035 | 1.42E-05  | 0.963 | 0.874 |
| rs9375813 | rs2179771  | <i>ARG1</i> | 131796623 | -0.177 | 0.034 | 2.14E-07  | 1     | 0.999 |
| rs9375813 | rs9492976  | <i>ARG1</i> | 131797691 | -0.177 | 0.034 | 2.06E-07  | 1     | 0.999 |
| rs9375813 | rs9483280  | <i>ARG1</i> | 131798329 | -0.177 | 0.034 | 2.02E-07  | 1     | 0.999 |
| rs9375813 | rs9402328  | <i>ARG1</i> | 131798744 | -0.177 | 0.034 | 2.02E-07  | 1     | 0.999 |
| rs9375813 | rs2143779  | <i>ARG1</i> | 131800478 | -0.177 | 0.034 | 2.05E-07  | 1     | 0.999 |
| rs9375813 | rs2608903  | <i>ARG1</i> | 131805071 | -0.076 | 0.024 | 1.35E-03  | 0.998 | 0.260 |
| rs9375813 | rs9483281  | <i>ARG1</i> | 131806872 | -0.176 | 0.034 | 2.31E-07  | 0.999 | 0.999 |
| rs9375813 | rs6904726  | <i>ARG1</i> | 131810390 | -0.174 | 0.034 | 3.26E-07  | 0.999 | 0.999 |
| rs9375813 | rs6904733  | <i>ARG1</i> | 131810402 | -0.174 | 0.034 | 3.26E-07  | 0.999 | 0.999 |
| rs9375813 | rs6927792  | <i>ARG1</i> | 131810800 | -0.174 | 0.034 | 3.26E-07  | 0.999 | 0.999 |
| rs9375813 | rs2491209  | <i>ARG1</i> | 131822823 | -0.158 | 0.035 | 7.82E-06  | 0.988 | 0.923 |
| rs9375813 | rs2608951  | <i>ARG1</i> | 131825473 | -0.174 | 0.033 | 1.96E-07  | 0.996 | 0.951 |
| rs9375813 | rs2608935  | <i>ARG1</i> | 131831429 | -0.171 | 0.034 | 3.68E-07  | 0.995 | 0.940 |
| rs9375813 | rs2807272  | <i>ARG1</i> | 131832938 | -0.157 | 0.035 | 6.30E-06  | 0.969 | 0.903 |
| rs9375813 | rs2608928  | <i>ARG1</i> | 131833564 | -0.173 | 0.034 | 2.54E-07  | 0.997 | 0.960 |
| rs9375813 | rs2807273  | <i>ARG1</i> | 131834214 | -0.156 | 0.035 | 7.10E-06  | 0.968 | 0.903 |
| rs9375813 | rs2608927  | <i>ARG1</i> | 131835736 | -0.172 | 0.034 | 2.80E-07  | 0.997 | 0.959 |
| rs9375813 | rs9321294  | <i>ARG1</i> | 131837250 | -0.173 | 0.034 | 2.75E-07  | 0.997 | 0.959 |
| rs9375813 | rs2491204  | <i>ARG1</i> | 131839097 | -0.173 | 0.034 | 2.69E-07  | 0.997 | 0.958 |
| rs9375813 | rs4443525  | <i>ARG1</i> | 131839960 | -0.155 | 0.035 | 8.64E-06  | 0.968 | 0.902 |
| rs9375813 | rs2608940  | <i>ARG1</i> | 131840624 | -0.155 | 0.035 | 8.64E-06  | 0.968 | 0.902 |

**Table S5.** Associations of the previously reported CRP-related loci.

| SNP        | Chr | Position* (bp) | Nearest Gene | MAF  | Type**    | Minor allele | Effect Size | P        | Reference                                |
|------------|-----|----------------|--------------|------|-----------|--------------|-------------|----------|------------------------------------------|
| rs6700896  | 1   | 65862370       | <i>LEPR</i>  | 0.11 | imputed   | C            | -0.017      | 0.6171   | Elliot et al, 2009                       |
| rs1805096  | 1   | 65874845       | <i>LEPR</i>  | 0.11 | genotyped | G            | -0.017      | 0.6164   | Reiner et al, 2012                       |
| rs1892534  | 1   | 65878532       | <i>LEPR</i>  | 0.11 | genotyped | C            | -0.018      | 0.6002   | Ridker et al, 2008                       |
| rs2186245  | 1   | 65890652       | <i>LEPR</i>  | 0.24 | imputed   | C            | -0.018      | 0.4948   | Ridker et al, 2008                       |
| rs12022410 | 1   | 65926521       | <i>LEPR</i>  | 0.09 | imputed   | A            | -0.051      | 0.1911   | Ridker et al, 2008                       |
| rs2211651  | 1   | 65928609       | <i>LEPR</i>  | 0.11 | imputed   | G            | -0.015      | 0.6609   | Ridker et al, 2008                       |
| rs2889195  | 1   | 65929318       | <i>LEPR</i>  | 0.11 | genotyped | C            | -0.012      | 0.7178   | Ridker et al, 2008                       |
| rs4291477  | 1   | 65963663       | <i>PDE4B</i> | 0.17 | genotyped | G            | -0.029      | 0.3151   | Ridker et al, 2008                       |
| rs4537545  | 1   | 152685503      | <i>IL6R</i>  | 0.44 | genotyped | T            | -0.056      | 0.0112   | Elliot et al, 2009                       |
| rs4129267  | 1   | 152692888      | <i>IL6R</i>  | 0.44 | imputed   | T            | -0.059      | 0.0089   | Ridker et al, 2008                       |
| rs8192284  | 1   | 152693594      | <i>IL6R</i>  | 0.44 | imputed   | C            | -0.059      | 0.0087   | Ridker et al, 2008;<br>Okada et al, 2011 |
| rs12093699 | 1   | 157914612      | <i>CRP</i>   | 0.06 | imputed   | A            | 0.147       | 0.0017   | Ridker et al, 2008                       |
| rs876537   | 1   | 157941557      | <i>CRP</i>   | 0.36 | imputed   | C            | 0.182       | 3.61E-15 | Wu et al, 2012                           |
| rs2794520  | 1   | 157945440      | <i>CRP</i>   | 0.36 | imputed   | C            | 0.181       | 2.82E-15 | Ridker et al, 2008                       |
| rs3093075  | 1   | 157946537      | <i>CRP</i>   | 0.15 | imputed   | T            | 0.190       | 8.66E-10 | Ridker et al, 2008                       |
| rs1205     | 1   | 157948857      | <i>CRP</i>   | 0.36 | imputed   | C            | 0.181       | 2.21E-15 | Ridker et al, 2008                       |
| rs1417938  | 1   | 157950810      | <i>CRP</i>   | 0.07 | imputed   | A            | 0.169       | 9.89E-05 | Ridker et al, 2008                       |

|            |    |           |                            |      |           |   |        |          |                                                                  |
|------------|----|-----------|----------------------------|------|-----------|---|--------|----------|------------------------------------------------------------------|
| rs2027471  | 1  | 157956012 | <i>CRP</i>                 | 0.34 | imputed   | T | 0.171  | 2.30E-13 | Ridker et al, 2008                                               |
| rs3116656  | 1  | 157958996 | <i>CRP</i>                 | 0.07 | imputed   | G | 0.182  | 1.58E-05 | Ridker et al, 2008                                               |
| rs12068753 | 1  | 157959161 | <i>CRP</i>                 | 0.14 | genotyped | A | 0.197  | 3.41E-10 | Ridker et al, 2008                                               |
| rs3116653  | 1  | 157963534 | <i>CRP</i>                 | 0.08 | imputed   | C | 0.173  | 2.98E-05 | Ridker et al, 2008                                               |
| rs3116651  | 1  | 157965109 | <i>CRP</i>                 | 0.08 | genotyped | T | 0.171  | 3.44E-05 | Ridker et al, 2008                                               |
| rs7553007  | 1  | 157965173 | <i>CRP</i>                 | 0.37 | genotyped | G | 0.182  | 7.34E-16 | Ridker et al, 2008;<br>Elliot et al, 2009;<br>Reiner et al, 2012 |
| rs780094   | 2  | 27594741  | <i>GCKR</i>                | 0.46 | genotyped | C | -0.059 | 0.0067   | Ridker et al, 2008                                               |
| rs1260333  | 2  | 27602128  | <i>GCKR</i>                | 0.46 | imputed   | G | -0.062 | 0.0054   | Ridker et al, 2008                                               |
| rs2097677  | 7  | 22699364  | <i>IL6</i>                 | 0.24 | imputed   | A | 0.091  | 0.0004   | Okada et al, 2011                                                |
| rs10778213 | 12 | 102019281 | <i>ASCLI</i>               | 0.17 | imputed   | T | 0.055  | 0.0607   | Ridker et al, 2008                                               |
| rs7305618  | 12 | 119887315 | <i>HNFI1A</i>              | 0.47 | imputed   | T | 0.099  | 6.86E-06 | Wu et al, 2012                                                   |
| rs7953249  | 12 | 119888107 | <i>HNFI1A</i>              | 0.47 | genotyped | A | 0.097  | 9.85E-06 | Ridker et al, 2008                                               |
| rs7310409  | 12 | 119909244 | <i>HNFI1A</i>              | 0.48 | imputed   | A | -0.116 | 1.38E-07 | Ridker et al, 2008;<br>Okada et al, 2011                         |
| rs2464196  | 12 | 119919810 | <i>HNFI1A</i>              | 0.45 | imputed   | G | 0.119  | 8.58E-08 | Ridker et al, 2008                                               |
| rs2259816  | 12 | 119919970 | <i>HNFI1A</i>              | 0.45 | genotyped | G | 0.119  | 7.10E-08 | Reiner et al, 2012                                               |
| rs1169307  | 12 | 119922765 | <i>HNFI1A</i>              | 0.10 | imputed   | T | 0.131  | 0.0003   | Ridker et al, 2008                                               |
| rs735396   | 12 | 119923227 | <i>HNFI1A</i>              | 0.44 | imputed   | T | 0.121  | 5.34E-08 | Ridker et al, 2008                                               |
| rs4420638  | 19 | 50114786  | <i>APOE-CI-CII cluster</i> | 0.11 | genotyped | G | -0.098 | 0.0040   | Elliot et al, 2009;<br>Okada et al, 2011                         |

\*Position is based on NCBI human genome build 36.3 (hg18)

\*\*Type indicates if a SNP is genotype or imputed; Chr, Chromosome; MAF, minor allele frequency

**Table S6. Re-prioritized genetic variants list after GWAS.**

| SNPs             | Chr      | Position         | GWAS<br>P-value | Final<br>Weight | Before<br>Re-prioritization | After<br>Re-prioritization |
|------------------|----------|------------------|-----------------|-----------------|-----------------------------|----------------------------|
| rs7553007        | 1        | 157965173        | 7.34E-16        | 5.40E-16        | 1                           | 1                          |
| rs1205           | 1        | 157948857        | 2.21E-15        | 2.27E-15        | 2                           | 2                          |
| rs2794520        | 1        | 157945440        | 2.82E-15        | 2.49E-15        | 4                           | 3                          |
| rs2808629        | 1        | 157943420        | 2.50E-15        | 3.27E-15        | 3                           | 4                          |
| rs2808628        | 1        | 157942635        | 3.43E-15        | 4.48E-15        | 5                           | 5                          |
| rs876537         | 1        | 157941557        | 3.61E-15        | 4.72E-15        | 6                           | 6                          |
| rs2027471        | 1        | 157956012        | 2.30E-13        | 3.01E-13        | 7                           | 7                          |
| rs1341665        | 1        | 157958183        | 2.98E-13        | 3.89E-13        | 8                           | 8                          |
| rs16842599       | 1        | 157964099        | 2.39E-10        | 2.46E-10        | 9                           | 9                          |
| rs12081480       | 1        | 157973614        | 2.96E-10        | 3.05E-10        | 12                          | 10                         |
| rs16842568       | 1        | 157942844        | 2.54E-10        | 3.32E-10        | 10                          | 11                         |
| rs16842559       | 1        | 157942795        | 2.54E-10        | 3.32E-10        | 11                          | 12                         |
| rs12081252       | 1        | 157973137        | 3.28E-10        | 3.38E-10        | 13                          | 13                         |
| rs12081264       | 1        | 157973184        | 3.81E-10        | 3.92E-10        | 15                          | 14                         |
| rs12068753       | 1        | 157959161        | 3.41E-10        | 4.46E-10        | 14                          | 15                         |
| <b>rs2608912</b> | <b>6</b> | <b>131911476</b> | <b>7.94E-06</b> | <b>7.22E-10</b> | <b>87</b>                   | <b>16</b>                  |
| <b>rs2608976</b> | <b>6</b> | <b>131919868</b> | <b>8.52E-06</b> | <b>7.62E-10</b> | <b>88</b>                   | <b>17</b>                  |
| rs3093075        | 1        | 157946537        | 8.66E-10        | 1.13E-09        | 16                          | 18                         |
| <b>rs2608921</b> | <b>6</b> | <b>131915428</b> | <b>7.89E-06</b> | <b>1.21E-09</b> | <b>81</b>                   | <b>19</b>                  |
| rs3093077        | 1        | 157946260        | 9.30E-10        | 1.22E-09        | 17                          | 20                         |
| rs16842502       | 1        | 157920487        | 7.80E-09        | 1.02E-08        | 18                          | 21                         |
| rs1169310        | 12       | 119923816        | 4.95E-08        | 5.10E-08        | 19                          | 22                         |
| rs1169306        | 12       | 119922694        | 5.15E-08        | 5.30E-08        | 20                          | 23                         |
| rs735396         | 12       | 119923227        | 5.34E-08        | 5.50E-08        | 21                          | 24                         |
| rs2464195        | 12       | 119919858        | 5.83E-08        | 6.00E-08        | 22                          | 25                         |
| rs1169313        | 12       | 119927053        | 6.66E-08        | 6.86E-08        | 23                          | 26                         |
| rs2259816        | 12       | 119919970        | 7.10E-08        | 7.31E-08        | 24                          | 27                         |
| rs2464196        | 12       | 119919810        | 8.58E-08        | 8.83E-08        | 25                          | 28                         |
| rs2259820        | 12       | 119919725        | 8.58E-08        | 8.83E-08        | 26                          | 29                         |
| rs2393791        | 12       | 119908339        | 8.89E-08        | 9.15E-08        | 27                          | 30                         |
| rs7310409        | 12       | 119909244        | 1.38E-07        | 1.42E-07        | 28                          | 31                         |
| rs2393775        | 12       | 119908957        | 1.75E-07        | 1.80E-07        | 29                          | 32                         |
| rs1891187        | 1        | 157895677        | 2.34E-07        | 2.07E-07        | 42                          | 33                         |
| rs4275453        | 1        | 157974671        | 2.06E-07        | 2.12E-07        | 36                          | 34                         |
| rs1446976        | 1        | 157895818        | 2.32E-07        | 2.13E-07        | 41                          | 35                         |
| rs1891186        | 1        | 157895645        | 2.34E-07        | 2.32E-07        | 43                          | 36                         |
| rs2794526        | 1        | 157892102        | 1.79E-07        | 2.34E-07        | 30                          | 37                         |
| rs2608951        | 6        | 131825473        | 1.96E-07        | 2.56E-07        | 31                          | 38                         |
| rs9402328        | 6        | 131798744        | 2.02E-07        | 2.64E-07        | 32                          | 39                         |
| rs9483280        | 6        | 131798329        | 2.02E-07        | 2.64E-07        | 33                          | 40                         |
| rs2143779        | 6        | 131800478        | 2.05E-07        | 2.68E-07        | 34                          | 41                         |
| rs9492976        | 6        | 131797691        | 2.06E-07        | 2.69E-07        | 35                          | 42                         |
| rs2179771        | 6        | 131796623        | 2.14E-07        | 2.80E-07        | 37                          | 43                         |
| rs9375813        | 6        | 131798940        | 2.30E-07        | 3.01E-07        | 38                          | 44                         |
| rs9483281        | 6        | 131806872        | 2.31E-07        | 3.02E-07        | 39                          | 45                         |
| rs1446975        | 1        | 157895966        | 2.32E-07        | 3.03E-07        | 40                          | 46                         |

|            |    |           |          |          |    |    |
|------------|----|-----------|----------|----------|----|----|
| rs2608928  | 6  | 131833564 | 2.54E-07 | 3.32E-07 | 44 | 47 |
| rs2491204  | 6  | 131839097 | 2.69E-07 | 3.52E-07 | 45 | 48 |
| rs9321294  | 6  | 131837250 | 2.75E-07 | 3.59E-07 | 46 | 49 |
| rs2608927  | 6  | 131835736 | 2.80E-07 | 3.66E-07 | 47 | 50 |
| rs1182933  | 12 | 119939005 | 4.05E-07 | 4.17E-07 | 52 | 51 |
| rs6927792  | 6  | 131810800 | 3.26E-07 | 4.26E-07 | 48 | 52 |
| rs6904733  | 6  | 131810402 | 3.26E-07 | 4.26E-07 | 49 | 53 |
| rs6904726  | 6  | 131810390 | 3.26E-07 | 4.26E-07 | 50 | 54 |
| rs2608935  | 6  | 131831429 | 3.68E-07 | 4.81E-07 | 51 | 55 |
| rs12087465 | 1  | 157891923 | 4.17E-07 | 5.45E-07 | 53 | 56 |
| rs9492992  | 6  | 131844120 | 6.88E-07 | 8.99E-07 | 54 | 57 |
| rs2794500  | 1  | 157901645 | 7.94E-07 | 1.04E-06 | 55 | 58 |
| rs7740929  | 6  | 131850315 | 8.41E-07 | 1.10E-06 | 56 | 59 |
| rs9493000  | 6  | 131850284 | 8.41E-07 | 1.10E-06 | 57 | 60 |
| rs3861462  | 6  | 131851129 | 1.04E-06 | 1.36E-06 | 58 | 61 |
| rs2708101  | 12 | 119972015 | 1.36E-06 | 1.40E-06 | 59 | 62 |
| rs796126   | 10 | 32008765  | 1.76E-06 | 2.30E-06 | 60 | 63 |
| rs796127   | 10 | 32008735  | 1.95E-06 | 2.55E-06 | 61 | 64 |
| rs2488384  | 10 | 32013773  | 2.20E-06 | 2.88E-06 | 62 | 65 |
| rs1775437  | 10 | 32004232  | 2.35E-06 | 3.07E-06 | 63 | 66 |
| rs2608913  | 6  | 131911954 | 3.76E-06 | 3.87E-06 | 65 | 67 |
| rs796130   | 10 | 32006513  | 2.97E-06 | 3.88E-06 | 64 | 68 |
| rs1841972  | 5  | 121824037 | 4.87E-06 | 6.36E-06 | 66 | 69 |
| rs1920792  | 12 | 119888967 | 6.35E-06 | 6.54E-06 | 70 | 70 |
| rs2062375  | 8  | 120046973 | 5.22E-06 | 6.82E-06 | 67 | 71 |
| rs7305618  | 12 | 119887315 | 6.86E-06 | 7.06E-06 | 74 | 72 |
| rs2608917  | 6  | 131913649 | 6.93E-06 | 7.14E-06 | 76 | 73 |
| rs17596685 | 13 | 42015201  | 6.69E-06 | 7.47E-06 | 71 | 74 |
| rs2446213  | 6  | 131915724 | 7.55E-06 | 7.77E-06 | 79 | 75 |
| rs2608919  | 6  | 131915028 | 7.89E-06 | 8.12E-06 | 82 | 76 |
| rs2608918  | 6  | 131914585 | 7.93E-06 | 8.17E-06 | 83 | 77 |
| rs2608916  | 6  | 131913298 | 7.93E-06 | 8.17E-06 | 84 | 78 |
| rs2608915  | 6  | 131913007 | 7.93E-06 | 8.17E-06 | 85 | 79 |
| rs2608914  | 6  | 131912304 | 7.94E-06 | 8.18E-06 | 86 | 80 |
| rs9969672  | 8  | 120075261 | 6.29E-06 | 8.22E-06 | 68 | 81 |
| rs2807272  | 6  | 131832938 | 6.30E-06 | 8.23E-06 | 69 | 82 |
| rs2749933  | 6  | 131918926 | 8.52E-06 | 8.77E-06 | 89 | 83 |
| rs2781651  | 6  | 131918636 | 8.52E-06 | 8.77E-06 | 90 | 84 |
| rs2781650  | 6  | 131918414 | 8.52E-06 | 8.77E-06 | 91 | 85 |
| rs2608982  | 6  | 131917893 | 8.52E-06 | 8.77E-06 | 92 | 86 |
| rs7014574  | 8  | 120046258 | 6.78E-06 | 8.86E-06 | 72 | 87 |
| rs10478555 | 5  | 121809430 | 6.78E-06 | 8.86E-06 | 73 | 88 |
| rs11992136 | 8  | 120072908 | 6.92E-06 | 9.04E-06 | 75 | 89 |
| rs12517578 | 5  | 106008730 | 6.98E-06 | 9.12E-06 | 77 | 90 |
| rs2807273  | 6  | 131834214 | 7.10E-06 | 9.28E-06 | 78 | 91 |
| rs1169303  | 12 | 119920759 | 9.47E-06 | 9.75E-06 | 96 | 92 |
| rs7953249  | 12 | 119888107 | 9.85E-06 | 1.01E-05 | 98 | 93 |
| rs2491209  | 6  | 131822823 | 7.82E-06 | 1.02E-05 | 80 | 94 |
| rs2608940  | 6  | 131840624 | 8.64E-06 | 1.13E-05 | 93 | 95 |
| rs4443525  | 6  | 131839960 | 8.64E-06 | 1.13E-05 | 94 | 96 |

|           |    |           |          |          |     |     |
|-----------|----|-----------|----------|----------|-----|-----|
| rs796082  | 10 | 31960297  | 9.24E-06 | 1.21E-05 | 95  | 97  |
| rs2062377 | 8  | 120076601 | 9.85E-06 | 1.29E-05 | 97  | 98  |
| rs1978838 | 5  | 106008311 | 1.01E-05 | 1.32E-05 | 99  | 99  |
| rs7010267 | 8  | 120015837 | 1.05E-05 | 1.37E-05 | 100 | 100 |

**Bold characters represent three SNPs, rs2608912, rs2608976, rs2608921, whose ranking of significance levels became highly elevated after SNP prioritization from 87th, 88th and 81th to 16th, 17th and 19th, respectively.**



**Table S7.** Associations of the top significant SNP polymorphisms on cardiovascular disease traits based on the whole KARE samples (7,626 samples).

| Disease Trait           | N <sup>¶</sup> | Chr      | SNP              | Position         | Minor Allele | P*            | OR <sup>†</sup> | SE          | L95 <sup>‡</sup> | U95 <sup>§</sup> |
|-------------------------|----------------|----------|------------------|------------------|--------------|---------------|-----------------|-------------|------------------|------------------|
| Myocardial infarction   | 55             | 1        | rs7553007        | 157965173        | G            | 0.1566        | 1.31            | 0.19        | 0.90             | 1.92             |
|                         |                | 6        | rs9375813        | 131798940        | A            | 0.3262        | 0.71            | 0.35        | 0.36             | 1.41             |
|                         |                | 12       | rs2393791        | 119908339        | C            | 0.3223        | 1.21            | 0.19        | 0.83             | 1.77             |
| Coronary artery disease | 65             | 1        | rs7553007        | 157965173        | G            | 0.9496        | 1.01            | 0.18        | 0.71             | 1.45             |
|                         |                | 6        | rs9375813        | 131798940        | A            | 0.3253        | 0.73            | 0.32        | 0.39             | 1.36             |
|                         |                | 12       | rs2393791        | 119908339        | C            | 0.1322        | 0.76            | 0.18        | 0.54             | 1.09             |
| Hypertension            | 1115           | 1        | rs7553007        | 157965173        | G            | 0.6138        | 1.03            | 0.05        | 0.93             | 1.13             |
|                         |                | <b>6</b> | <b>rs9375813</b> | <b>131798940</b> | <b>A</b>     | <b>0.0440</b> | <b>0.86</b>     | <b>0.08</b> | <b>0.74</b>      | <b>1.00</b>      |
|                         |                | 12       | rs2393791        | 119908339        | C            | 0.5570        | 0.97            | 0.05        | 0.89             | 1.07             |

¶N : Number of case samples

\*P: Age and gender adjusted logistic regression was performed based on the above phenotype.

†OR: Estimated odds ratio for minor allele

‡L95: Lower bound of 95% confidence interval for odds ratio

§U95: Upper bound of 95% confidence interval for odds ratio

**Table S8.** Genes mapped with variant in adaptive immune response.

| <b>Gene Name</b> | <b>Variant</b> | <b>Functional Class*</b> | <b><math>-\log_{10}(P\text{-value})^{**}</math></b> |
|------------------|----------------|--------------------------|-----------------------------------------------------|
| <i>CRP</i>       | rs7553007      | -                        | 15.134                                              |
| <i>EXO1</i>      | rs1418761      | -                        | 3.079                                               |
| <i>TLR4</i>      | rs2244872      | -                        | 2.409                                               |
| <i>C9</i>        | rs2738238      | -                        | 2.407                                               |
| <i>CTSC</i>      | rs217090       | -                        | 2.363                                               |
| <i>SYK</i>       | rs2613310      | -                        | 2.281                                               |
| <i>CD46</i>      | rs7144         | -                        | 2.121                                               |
| <i>PRKCD</i>     | rs13084863     | -                        | 2                                                   |
| <i>IL12B</i>     | rs6896881      | -                        | 1.965                                               |
| <i>TXK</i>       | rs10938521     | -                        | 1.85                                                |
| <i>C8B</i>       | rs599857       | -                        | 1.803                                               |
| <i>CR1</i>       | rs677066       | -                        | 1.797                                               |
| <i>MSH2</i>      | rs6708696      | -                        | 1.744                                               |
| <i>PIK3CD</i>    | rs4240896      | -                        | 1.734                                               |
| <i>RIPK2</i>     | rs2665636      | -                        | 1.726                                               |
| <i>PIK3CG</i>    | rs7804699      | -                        | 1.718                                               |
| <i>CADM1</i>     | rs693246       | -                        | 1.692                                               |
| <i>C5</i>        | rs2159777      | -                        | 1.648                                               |
| <i>IFNG</i>      | rs4244065      | -                        | 1.614                                               |
| <i>RAB27A</i>    | rs9920114      | -                        | 1.608                                               |
| <i>IFNB1</i>     | rs4977657      | -                        | 1.551                                               |
| <i>JAM3</i>      | rs661820       | -                        | 1.535                                               |
| <i>LIG4</i>      | rs16971751     | -                        | 1.53                                                |
| <i>ITK</i>       | rs25856        | -                        | 1.527                                               |
| <i>MEF2C</i>     | rs4521516      | -                        | 1.496                                               |
| <i>KLHL6</i>     | rs7618957      | -                        | 1.418                                               |
| <i>C7</i>        | rs2455307      | -                        | 1.411                                               |
| <i>CR2</i>       | rs7527218      | -                        | 1.408                                               |
| <i>HSPD1</i>     | rs13386066     | -                        | 1.407                                               |
| <i>MBL2</i>      | rs12262251     | -                        | 1.401                                               |
| <i>VEGFA</i>     | rs4714696      | -                        | 1.386                                               |
| <i>RORC</i>      | rs3828057      | -                        | 1.368                                               |
| <i>POU2F2</i>    | rs11883412     | -                        | 1.355                                               |
| <i>GCNT3</i>     | rs6494120      | -                        | 1.351                                               |

|                  |            |   |       |
|------------------|------------|---|-------|
| <i>LYST</i>      | rs12038267 | - | 1.332 |
| <i>SERPING1</i>  | rs2729358  | - | 1.326 |
| <i>ZAP70</i>     | rs2290127  | - | 1.323 |
| <i>CLU</i>       | rs1316801  | - | 1.305 |
| <i>C3</i>        | rs11569538 | - | 1.303 |
| <i>MLH1</i>      | rs1540354  | - | 1.232 |
| <i>IL18</i>      | rs360729   | - | 1.207 |
| <i>EXOSC3</i>    | rs10814621 | - | 1.156 |
| <i>CTSH</i>      | rs12438191 | - | 1.126 |
| <i>FAS</i>       | rs17378702 | - | 1.107 |
| <i>BCL6</i>      | rs873205   | - | 1.04  |
| <i>TNFSF4</i>    | rs16845607 | - | 1.03  |
| <i>CXCL13</i>    | rs1500498  | - | 0.973 |
| <i>IL4</i>       | rs2243283  | - | 0.962 |
| <i>CTSS</i>      | rs12568757 | - | 0.922 |
| <i>C8A</i>       | rs635833   | - | 0.888 |
| <i>C6</i>        | rs3805716  | - | 0.874 |
| <i>NBN</i>       | rs1805793  | - | 0.858 |
| <i>LEF1</i>      | rs11097978 | - | 0.827 |
| <i>NOD2</i>      | rs1981760  | - | 0.819 |
| <i>DLG1</i>      | rs768858   | - | 0.811 |
| <i>C4BPA</i>     | rs10746451 | - | 0.758 |
| <i>TNFRSF11A</i> | rs3744929  | - | 0.725 |
| <i>CD55</i>      | rs2940252  | - | 0.723 |
| <i>C2</i>        | rs9267673  | - | 0.717 |
| <i>C1RL</i>      | rs744141   | - | 0.691 |
| <i>AICDA</i>     | rs4883169  | - | 0.683 |
| <i>XRCC4</i>     | rs6894425  | - | 0.677 |
| <i>HLA-DRB1</i>  | rs615672   | - | 0.63  |
| <i>CFI</i>       | rs4698788  | - | 0.621 |
| <i>MASP2</i>     | rs7556039  | - | 0.618 |
| <i>TGFB1</i>     | rs2241716  | - | 0.616 |
| <i>FCER1G</i>    | rs4489574  | - | 0.609 |
| <i>SWAP70</i>    | rs10770049 | - | 0.593 |
| <i>UNC13D</i>    | rs8067076  | - | 0.592 |
| <i>C1S</i>       | rs7306673  | - | 0.568 |
| <i>CD74</i>      | rs2569094  | - | 0.565 |

|                 |            |   |       |
|-----------------|------------|---|-------|
| <i>LY9</i>      | rs4656932  | - | 0.539 |
| <i>BCL3</i>     | rs8100239  | - | 0.529 |
| <i>INPP5D</i>   | rs3935584  | - | 0.526 |
| <i>BCL10</i>    | rs11161585 | - | 0.502 |
| <i>CRTAM</i>    | rs7126620  | - | 0.419 |
| <i>MSH6</i>     | rs17036815 | - | 0.398 |
| <i>HLA-DQB1</i> | rs35120848 | - | 0.344 |
| <i>C1QA</i>     | rs158762   | - | 0.337 |
| <i>TLR6</i>     | rs3775073  | - | 0.334 |
| <i>CD8A</i>     | rs1515950  | - | 0.307 |
| <i>C3AR1</i>    | rs10846450 | - | 0.28  |
| <i>SLC11A1</i>  | rs13062    | - | 0.267 |
| <i>ADAM17</i>   | rs10929587 | - | 0.264 |
| <i>MYD88</i>    | rs7744     | - | 0.232 |
| <i>SLA2</i>     | rs221308   | - | 0.224 |
| <i>HLA-DMA</i>  | rs1050391  | - | 0.221 |
| <i>ZP3</i>      | rs1019096  | - | 0.207 |
| <i>NFKB2</i>    | rs11574851 | - | 0.194 |
| <i>C1QB</i>     | rs629409   | - | 0.181 |
| <i>C4BPB</i>    | rs8942     | - | 0.137 |
| <i>STAT6</i>    | rs12368672 | - | 0.129 |
| <i>CTSL1</i>    | rs2274611  | - | 0.059 |

---

\*Functional class, SNPs that may alter protein, gene expression or the role of protein in context of pathway

\*\* $-\log_{10}(P)$  for SNP in discovery phase of this GWAS

**Table S9.** Genes mapped with variant in leukocyte mediated immunity.

| <b>Gene Name</b> | <b>Variant</b> | <b>Functional Class</b> | <b>-log<sub>10</sub>( P-value)</b> |
|------------------|----------------|-------------------------|------------------------------------|
| <i>CRP</i>       | rs7553007      | -                       | 15.134                             |
| <i>IL6</i>       | rs2961312      | -                       | 3.197                              |
| <i>EXO1</i>      | rs1418761      | -                       | 3.079                              |
| <i>TLR4</i>      | rs2244872      | -                       | 2.409                              |
| <i>C9</i>        | rs2738238      | -                       | 2.407                              |
| <i>CTSC</i>      | rs217090       | -                       | 2.363                              |
| <i>CLEC2A</i>    | rs7957464      | -                       | 2.361                              |
| <i>CPLX2</i>     | rs2443541      | -                       | 2.313                              |
| <i>CD46</i>      | rs7144         | -                       | 2.121                              |
| <i>PRKCD</i>     | rs13084863     | -                       | 2                                  |
| <i>IL6R</i>      | rs4537545      | -                       | 1.952                              |
| <i>C8B</i>       | rs599857       | -                       | 1.803                              |
| <i>CR1</i>       | rs677066       | -                       | 1.797                              |
| <i>MSH2</i>      | rs6708696      | -                       | 1.744                              |
| <i>PIK3CD</i>    | rs4240896      | -                       | 1.734                              |
| <i>PIK3CG</i>    | rs7804699      | -                       | 1.718                              |
| <i>CADM1</i>     | rs693246       | -                       | 1.692                              |
| <i>YWHAZ</i>     | rs1470764      | -                       | 1.688                              |
| <i>C5</i>        | rs2159777      | -                       | 1.648                              |
| <i>RAB27A</i>    | rs9920114      | -                       | 1.608                              |
| <i>LIG4</i>      | rs16971751     | -                       | 1.53                               |
| <i>C7</i>        | rs2455307      | -                       | 1.411                              |
| <i>MYO1F</i>     | rs12462590     | -                       | 1.41                               |
| <i>CR2</i>       | rs7527218      | -                       | 1.408                              |
| <i>HSPD1</i>     | rs13386066     | -                       | 1.407                              |
| <i>MBL2</i>      | rs12262251     | -                       | 1.401                              |
| <i>ANXA3</i>     | rs6855458      | -                       | 1.376                              |
| <i>POU2F2</i>    | rs11883412     | -                       | 1.355                              |
| <i>GCNT3</i>     | rs6494120      | -                       | 1.351                              |
| <i>LYST</i>      | rs12038267     | -                       | 1.332                              |
| <i>SERPING1</i>  | rs2729358      | -                       | 1.326                              |
| <i>CLU</i>       | rs1316801      | -                       | 1.305                              |
| <i>C3</i>        | rs11569538     | -                       | 1.303                              |

|                 |            |   |       |
|-----------------|------------|---|-------|
| <i>MLL5</i>     | rs10274607 | - | 1.254 |
| <i>MLH1</i>     | rs1540354  | - | 1.232 |
| <i>EXOSC3</i>   | rs10814621 | - | 1.156 |
| <i>DBH</i>      | rs3025425  | - | 1.137 |
| <i>CTSH</i>     | rs12438191 | - | 1.126 |
| <i>FAS</i>      | rs17378702 | - | 1.107 |
| <i>TUBB</i>     | rs8233     | - | 1.094 |
| <i>SERPINB9</i> | rs318486   | - | 1.077 |
| <i>TNFSF4</i>   | rs16845607 | - | 1.03  |
| <i>CTSG</i>     | rs17257069 | - | 0.994 |
| <i>IL4</i>      | rs2243283  | - | 0.962 |
| <i>C8A</i>      | rs635833   | - | 0.888 |
| <i>ADORA3</i>   | rs2798564  | - | 0.874 |
| <i>C6</i>       | rs3805716  | - | 0.874 |
| <i>NBN</i>      | rs1805793  | - | 0.858 |
| <i>NOD2</i>     | rs1981760  | - | 0.819 |
| <i>DLG1</i>     | rs768858   | - | 0.811 |
| <i>STXBP3</i>   | rs11102337 | - | 0.773 |
| <i>C4BPA</i>    | rs10746451 | - | 0.758 |
| <i>CD55</i>     | rs2940252  | - | 0.723 |
| <i>C2</i>       | rs9267673  | - | 0.717 |
| <i>PLA2G1B</i>  | rs2522136  | - | 0.709 |
| <i>C1RL</i>     | rs744141   | - | 0.691 |
| <i>AICDA</i>    | rs4883169  | - | 0.683 |
| <i>XRCC4</i>    | rs6894425  | - | 0.677 |
| <i>SLAMF7</i>   | rs17378627 | - | 0.667 |
| <i>HLA-DRB1</i> | rs615672   | - | 0.63  |
| <i>CFI</i>      | rs4698788  | - | 0.621 |
| <i>MASP2</i>    | rs7556039  | - | 0.618 |
| <i>FCER1G</i>   | rs4489574  | - | 0.609 |
| <i>SWAP70</i>   | rs10770049 | - | 0.593 |
| <i>UNC13D</i>   | rs8067076  | - | 0.592 |
| <i>C1S</i>      | rs7306673  | - | 0.568 |
| <i>CD74</i>     | rs2569094  | - | 0.565 |
| <i>LY9</i>      | rs4656932  | - | 0.539 |
| <i>BCL3</i>     | rs8100239  | - | 0.529 |
| <i>INPP5D</i>   | rs3935584  | - | 0.526 |

|                 |            |   |       |
|-----------------|------------|---|-------|
| <i>BCL10</i>    | rs11161585 | - | 0.502 |
| <i>CRTAM</i>    | rs7126620  | - | 0.419 |
| <i>MSH6</i>     | rs17036815 | - | 0.398 |
| <i>LYN</i>      | rs16922296 | - | 0.385 |
| <i>ACE</i>      | rs4351     | - | 0.358 |
| <i>HLA-DQB1</i> | rs35120848 | - | 0.344 |
| <i>CIQA</i>     | rs158762   | - | 0.337 |
| <i>CD8A</i>     | rs1515950  | - | 0.307 |
| <i>LAT</i>      | rs9924619  | - | 0.305 |
| <i>CEBPG</i>    | rs17530508 | - | 0.299 |
| <i>SLC11A1</i>  | rs13062    | - | 0.267 |
| <i>ADAM17</i>   | rs10929587 | - | 0.264 |
| <i>MYD88</i>    | rs7744     | - | 0.232 |
| <i>SLA2</i>     | rs221308   | - | 0.224 |
| <i>HLA-DMA</i>  | rs1050391  | - | 0.221 |
| <i>ZP3</i>      | rs1019096  | - | 0.207 |
| <i>CIQB</i>     | rs629409   | - | 0.181 |
| <i>C4BPB</i>    | rs8942     | - | 0.137 |

---

**Table S10.** Genes mapped with variant in photoreceptor outer segment.

| <b>Gene Name</b> | <b>Variant</b> | <b>Functional Class</b> | <b><math>-\log_{10}(P\text{-value})</math></b> |
|------------------|----------------|-------------------------|------------------------------------------------|
| <i>HNF1A</i>     | rs2259816      | -                       | 7.149                                          |
| <i>RAPGEF4</i>   | rs1530591      | -                       | 2.877                                          |
| <i>MAK</i>       | rs478791       | -                       | 2.799                                          |
| <i>RP1</i>       | rs9650182      | -                       | 2.289                                          |
| <i>MYRIP</i>     | rs17759069     | -                       | 2.145                                          |
| <i>PROM1</i>     | rs12152560     | -                       | 2.032                                          |
| <i>GNAT3</i>     | rs10954212     | -                       | 1.987                                          |
| <i>PCDH15</i>    | rs11003592     | -                       | 1.972                                          |
| <i>RP1L1</i>     | rs4427133      | -                       | 1.627                                          |
| <i>RAB27A</i>    | rs9920114      | -                       | 1.608                                          |
| <i>PTPRK</i>     | rs41514350     | -                       | 1.501                                          |
| <i>CNGA1</i>     | rs7694104      | -                       | 1.454                                          |
| <i>GNB1</i>      | rs2272908      | -                       | 1.401                                          |
| <i>TULP1</i>     | rs3777746      | -                       | 1.341                                          |
| <i>CNGB3</i>     | rs11988618     | -                       | 1.229                                          |
| <i>MYO5A</i>     | rs1693523      | -                       | 1.214                                          |
| <i>RHO</i>       | rs2855552      | -                       | 0.958                                          |
| <i>PDC</i>       | rs11803944     | -                       | 0.804                                          |
| <i>CNGA3</i>     | rs4851131      | -                       | 0.791                                          |
| <i>CDHR1</i>     | rs10509491     | -                       | 0.765                                          |
| <i>INHA</i>      | rs753974       | -                       | 0.558                                          |
| <i>PTGS1</i>     | rs1234909      | -                       | 0.454                                          |
| <i>MYO7A</i>     | rs3781695      | -                       | 0.452                                          |
| <i>C2orf71</i>   | rs17744052     | -                       | 0.432                                          |
| <i>MERTK</i>     | rs13016143     | -                       | 0.348                                          |
| <i>IQCB1</i>     | rs4311252      | -                       | 0.184                                          |
| <i>PPEF2</i>     | rs13434876     | -                       | 0.122                                          |



**Table S11.** Genes mapped with variant in cell surface binding.

| <b>Gene Name</b> | <b>Variant</b> | <b>Functional class</b> | <b><math>-\log_{10}(P\text{-value})</math></b> |
|------------------|----------------|-------------------------|------------------------------------------------|
| <i>CRP</i>       | rs7553007      | -                       | 15.134                                         |
| <i>PCSK6</i>     | rs1947942      | -                       | 2.162                                          |
| <i>CD36</i>      | rs17260734     | -                       | 2.045                                          |
| <i>PRB3</i>      | rs1834856      | -                       | 2.022                                          |
| <i>THBS1</i>     | rs2618162      | -                       | 1.644                                          |
| <i>SFTPD</i>     | rs2181204      | -                       | 1.551                                          |
| <i>STAB2</i>     | rs1866297      | -                       | 1.527                                          |
| <i>AIMP1</i>     | rs16999761     | -                       | 1.524                                          |
| <i>SELP</i>      | rs3917843      | -                       | 1.465                                          |
| <i>SELPLG</i>    | rs11114011     | -                       | 1.441                                          |
| <i>HSPD1</i>     | rs13386066     | -                       | 1.407                                          |
| <i>MBL2</i>      | rs12262251     | -                       | 1.401                                          |
| <i>VEGFA</i>     | rs4714696      | -                       | 1.386                                          |
| <i>PDGFC</i>     | rs2343116      | -                       | 1.376                                          |
| <i>BPI</i>       | rs7273966      | -                       | 1.322                                          |
| <i>ANXA5</i>     | rs4833753      | -                       | 1.32                                           |
| <i>SPN</i>       | rs1364182      | -                       | 1.3                                            |
| <i>F3</i>        | rs10782985     | -                       | 1.287                                          |
| <i>APOH</i>      | rs2873966      | -                       | 1.269                                          |
| <i>AGGF1</i>     | rs3762982      | -                       | 1.194                                          |
| <i>APOA4</i>     | rs1263173      | -                       | 1.038                                          |
| <i>TLR2</i>      | rs11938228     | -                       | 0.908                                          |
| <i>ATP5A1</i>    | rs9955008      | -                       | 0.881                                          |
| <i>LBP</i>       | rs2232596      | -                       | 0.753                                          |
| <i>PLA2G1B</i>   | rs2522136      | -                       | 0.709                                          |
| <i>HBEGF</i>     | rs2237077      | -                       | 0.631                                          |
| <i>CD1D</i>      | rs400214       | -                       | 0.631                                          |
| <i>CD48</i>      | rs352683       | -                       | 0.619                                          |
| <i>TGFB1</i>     | rs2241716      | -                       | 0.616                                          |
| <i>CD2</i>       | rs797999       | -                       | 0.603                                          |
| <i>ADIPOQ</i>    | rs6773957      | -                       | 0.518                                          |
| <i>DAG1</i>      | rs1050088      | -                       | 0.338                                          |

|                 |            |   |       |
|-----------------|------------|---|-------|
| <i>PLG</i>      | rs2144723  | - | 0.285 |
| <i>PGLYRP1</i>  | rs1861790  | - | 0.256 |
| <i>PDGFB</i>    | rs17000920 | - | 0.161 |
| <i>FGB</i>      | rs2059503  | - | 0.15  |
| <i>HRG</i>      | rs16861013 | - | 0.148 |
| <i>SPACA3</i>   | rs28906    | - | 0.141 |
| <i>ALB</i>      | rs16849267 | - | 0.13  |
| <i>LILRB2</i>   | rs4022330  | - | 0.121 |
| <i>SERPINF2</i> | rs4790285  | - | 0.048 |

---

**Table S12.** Genes mapped with variant in cholesterol binding

| <b>Gene Name</b> | <b>Variant</b> | <b>Functional</b> | <b>Class</b> | <b><math>-\log_{10}(P\text{-value})</math></b> |
|------------------|----------------|-------------------|--------------|------------------------------------------------|
| <i>CRP</i>       | rs7553007      | -                 |              | 15.134                                         |
| <i>ABCA1</i>     | rs4260948      | -                 |              | 2.749                                          |
| <i>SOAT1</i>     | rs425858       | -                 |              | 2.07                                           |
| <i>PTCH1</i>     | rs7862599      | -                 |              | 1.801                                          |
| <i>ABCG1</i>     | rs2839482      | -                 |              | 1.776                                          |
| <i>PMP2</i>      | rs6995156      | -                 |              | 1.41                                           |
| <i>APOA2</i>     | rs5085         | -                 |              | 1.139                                          |
| <i>NR1H3</i>     | rs7118396      | -                 |              | 0.74                                           |
| <i>CYP11A1</i>   | rs7174179      | -                 |              | 0.612                                          |
| <i>CAVI</i>      | rs1049334      | -                 |              | 0.557                                          |
| <i>NPC2</i>      | rs2358785      | -                 |              | 0.482                                          |
| <i>APOC3</i>     | rs2071523      | -                 |              | 0.389                                          |
| <i>SOAT2</i>     | rs12809590     | -                 |              | 0.323                                          |
| <i>TSPO2</i>     | rs9369260      | -                 |              | 0.315                                          |
| <i>STARD3</i>    | rs11869286     | -                 |              | 0.273                                          |
| <i>CETP</i>      | rs1800775      | -                 |              | 0.194                                          |
| <i>STAR</i>      | rs16887217     | -                 |              | 0.109                                          |
| <i>IHH</i>       | rs10208728     | -                 |              | 0.031                                          |

**Table S13.** Genes mapped with variant in bacterial cell surface binding

| <b>Gene Name</b> | <b>Variant</b> | <b>Functional Class</b> | <b>P-value</b> |
|------------------|----------------|-------------------------|----------------|
| <i>CRP</i>       | rs7553007      | -                       | 15.134         |
| <i>CD36</i>      | rs17260734     | -                       | 2.045          |
| <i>PRB3</i>      | rs1834856      | -                       | 2.022          |
| <i>SFTPD</i>     | rs2181204      | -                       | 1.551          |
| <i>STAB2</i>     | rs1866297      | -                       | 1.527          |
| <i>SELPLG</i>    | rs11114011     | -                       | 1.441          |
| <i>MBL2</i>      | rs12262251     | -                       | 1.401          |
| <i>BPI</i>       | rs7273966      | -                       | 1.322          |
| <i>SPN</i>       | rs1364182      | -                       | 1.3            |
| <i>TLR2</i>      | rs11938228     | -                       | 0.908          |
| <i>LBP</i>       | rs2232596      | -                       | 0.753          |
| <i>DAG1</i>      | rs1050088      | -                       | 0.338          |
| <i>PGLYRP1</i>   | rs1861790      | -                       | 0.256          |
| <i>SPACA3</i>    | rs28906        | -                       | 0.141          |

**Table 14.** Pathway analysis results of GSA-SNP software

| set name                                                            | gene count | set size | z-score  | p-value  | corrected p-value | FDR    |
|---------------------------------------------------------------------|------------|----------|----------|----------|-------------------|--------|
| low-density lipoprotein particle binding                            | 12         | 13       | 10.65696 | 0        | 0                 | <0.001 |
| lipoprotein particle binding                                        | 20         | 21       | 9.056942 | 0        | 0                 | <0.001 |
| protein-lipid complex binding                                       | 20         | 21       | 9.056942 | 0        | 0                 | <0.001 |
| opsonization                                                        | 7          | 7        | 7.509131 | 3.00E-14 | 4.84E-11          | <0.001 |
| negative regulation of lipid storage                                | 14         | 14       | 7.456615 | 4.42E-14 | 5.71E-11          | <0.001 |
| bacterial cell surface binding                                      | 16         | 17       | 7.360872 | 9.16E-14 | 9.86E-11          | <0.001 |
| quaternary ammonium group binding                                   | 15         | 15       | 7.349194 | 1.00E-13 | 9.23E-11          | <0.001 |
| negative regulation of macrophage derived foam cell differentiation | 13         | 13       | 7.251112 | 2.06E-13 | 1.66E-10          | <0.001 |
| regulation of lipid storage                                         | 30         | 31       | 6.647502 | 1.49E-11 | 1.07E-08          | <0.001 |
| humoral immune response mediated by circulating immunoglobulin      | 31         | 165      | 6.461015 | 5.20E-11 | 3.36E-08          | <0.001 |
| response to lead ion                                                | 13         | 14       | 6.119311 | 4.70E-10 | 2.76E-07          | <0.001 |
| complement activation, classical pathway                            | 26         | 160      | 6.087637 | 5.73E-10 | 3.08E-07          | <0.001 |
| regulation of macrophage derived foam cell differentiation          | 27         | 27       | 6.064354 | 6.62E-10 | 3.29E-07          | <0.001 |
| humoral immune response                                             | 72         | 220      | 5.744094 | 4.62E-09 | 2.13E-06          | <0.001 |
| cholesterol binding                                                 | 20         | 23       | 5.468741 | 2.27E-08 | 9.76E-06          | <0.001 |
| alcohol binding                                                     | 39         | 42       | 5.385632 | 3.61E-08 | 1.46E-05          | <0.001 |
| sterol binding                                                      | 27         | 30       | 5.211166 | 9.38E-08 | 3.57E-05          | <0.001 |
| presynaptic membrane                                                | 43         | 47       | 5.137044 | 1.40E-07 | 5.01E-05          | <0.001 |
| complement activation                                               | 33         | 174      | 4.856848 | 5.96E-07 | 2.03E-04          | <0.001 |

|                                                                                                                                                               |    |     |          |          |          |        |
|---------------------------------------------------------------------------------------------------------------------------------------------------------------|----|-----|----------|----------|----------|--------|
| interferon-gamma-mediated signaling pathway                                                                                                                   | 58 | 69  | 4.723106 | 1.16E-06 | 3.75E-04 | <0.001 |
| regulation of bone resorption                                                                                                                                 | 24 | 26  | 4.606352 | 2.05E-06 | 6.30E-04 | <0.001 |
| regulation of inclusion body assembly                                                                                                                         | 5  | 5   | 4.585766 | 2.26E-06 | 6.64E-04 | <0.001 |
| neuron cell-cell adhesion                                                                                                                                     | 12 | 12  | 4.54256  | 2.78E-06 | 7.80E-04 | <0.001 |
| regulation of axonogenesis                                                                                                                                    | 89 | 97  | 4.521542 | 3.07E-06 | 8.26E-04 | <0.001 |
| cell adhesion molecule binding                                                                                                                                | 50 | 52  | 4.519113 | 3.10E-06 | 8.02E-04 | <0.001 |
| bone resorption                                                                                                                                               | 18 | 18  | 4.490447 | 3.55E-06 | 8.83E-04 | <0.001 |
| cellular response to interferon-gamma                                                                                                                         | 73 | 84  | 4.472573 | 3.86E-06 | 9.25E-04 | <0.001 |
| immunoglobulin mediated immune response                                                                                                                       | 57 | 194 | 4.468101 | 3.95E-06 | 9.10E-04 | <0.001 |
| bone remodeling                                                                                                                                               | 29 | 31  | 4.441771 | 4.46E-06 | 9.94E-04 | <0.001 |
| adherens junction organization                                                                                                                                | 41 | 42  | 4.421697 | 4.90E-06 | 0.001054 | <0.001 |
| lymphocyte mediated immunity                                                                                                                                  | 78 | 216 | 4.38258  | 5.86E-06 | 0.001222 | <0.001 |
| B cell mediated immunity                                                                                                                                      | 59 | 196 | 4.368199 | 6.26E-06 | 0.001264 | <0.001 |
| ion gated channel activity                                                                                                                                    | 21 | 21  | 4.362452 | 6.43E-06 | 0.001259 | <0.001 |
| sarcoplasm                                                                                                                                                    | 46 | 53  | 4.361622 | 6.46E-06 | 0.001226 | <0.001 |
| neuron recognition                                                                                                                                            | 26 | 28  | 4.348114 | 6.87E-06 | 0.001267 | <0.001 |
| Ras guanyl-nucleotide exchange factor activity                                                                                                                | 88 | 93  | 4.341321 | 7.08E-06 | 0.001271 | <0.001 |
| oxidoreductase activity, acting on paired donors, with oxidation of a pair of donors resulting in the reduction of molecular oxygen to two molecules of water | 6  | 7   | 4.339601 | 7.14E-06 | 0.001246 | <0.001 |
| sensory perception of pain                                                                                                                                    | 47 | 50  | 4.286067 | 9.09E-06 | 0.001546 | <0.001 |
| regulation of gene expression by genetic imprinting                                                                                                           | 10 | 14  | 4.285719 | 9.11E-06 | 0.001509 | <0.001 |
| renal absorption                                                                                                                                              | 10 | 12  | 4.276583 | 9.49E-06 | 0.001533 | <0.001 |
| regulation of bone remodeling                                                                                                                                 | 27 | 29  | 4.244055 | 1.10E-05 | 0.001729 | <0.001 |

|                                                                                      |    |     |          |          |          |        |
|--------------------------------------------------------------------------------------|----|-----|----------|----------|----------|--------|
| renal system process                                                                 | 61 | 65  | 4.172091 | 1.51E-05 | 0.002321 | <0.001 |
| homophilic cell adhesion                                                             | 89 | 142 | 4.133757 | 1.78E-05 | 0.002681 | <0.001 |
| regulation of ion transmembrane transporter activity                                 | 87 | 92  | 4.129602 | 1.82E-05 | 0.002668 | <0.001 |
| Rac GTPase activator activity                                                        | 13 | 14  | 4.070027 | 2.35E-05 | 0.003374 | <0.001 |
| positive regulation of developmental growth                                          | 37 | 40  | 4.052437 | 2.53E-05 | 0.003559 | <0.001 |
| cell surface binding                                                                 | 49 | 54  | 4.022512 | 2.88E-05 | 0.003957 | <0.001 |
| regulation of ion transmembrane transport                                            | 99 | 104 | 4.004745 | 3.10E-05 | 0.004178 | <0.001 |
| regulation of developmental growth                                                   | 88 | 95  | 3.995403 | 3.23E-05 | 0.004257 | <0.001 |
| genetic imprinting                                                                   | 14 | 18  | 3.977398 | 3.48E-05 | 0.004501 | <0.001 |
| protein activation cascade                                                           | 51 | 194 | 3.973328 | 3.54E-05 | 0.004489 | <0.001 |
| sarcoplasmic reticulum                                                               | 43 | 49  | 3.962999 | 3.70E-05 | 0.004597 | <0.001 |
| positive regulation of vascular endothelial growth factor receptor signaling pathway | 15 | 16  | 3.951533 | 3.88E-05 | 0.004732 | <0.001 |
| M band                                                                               | 12 | 12  | 3.931123 | 4.23E-05 | 0.005057 | <0.001 |
| regulation of transmembrane transporter activity                                     | 91 | 97  | 3.913258 | 4.55E-05 | 0.005348 | <0.001 |
| activation of transmembrane receptor protein tyrosine kinase activity                | 9  | 10  | 3.902895 | 4.75E-05 | 0.005482 | <0.001 |
| regulation of calcium-mediated signaling                                             | 28 | 31  | 3.890484 | 5.00E-05 | 0.005669 | <0.001 |
| reverse cholesterol transport                                                        | 15 | 17  | 3.887109 | 5.07E-05 | 0.005649 | <0.001 |
| positive regulation of calcium-mediated signaling                                    | 21 | 23  | 3.851229 | 5.88E-05 | 0.006434 | <0.001 |
| sprouting angiogenesis                                                               | 31 | 33  | 3.843308 | 6.07E-05 | 0.006535 | <0.001 |
| regulation of protein tyrosine kinase activity                                       | 40 | 46  | 3.823879 | 6.57E-05 | 0.006956 | <0.001 |

|                                                                                                                           |    |     |          |          |          |        |
|---------------------------------------------------------------------------------------------------------------------------|----|-----|----------|----------|----------|--------|
| positive regulation of transcription initiation from RNA polymerase II promoter                                           | 5  | 6   | 3.821247 | 6.64E-05 | 0.006917 | <0.001 |
| sialyltransferase activity                                                                                                | 20 | 21  | 3.815319 | 6.80E-05 | 0.006973 | <0.001 |
| response to interferon-gamma                                                                                              | 88 | 99  | 3.815148 | 6.81E-05 | 0.006869 | <0.001 |
| regulation of kidney size                                                                                                 | 5  | 5   | 3.785822 | 7.66E-05 | 0.007613 | <0.001 |
| steroid binding                                                                                                           | 61 | 73  | 3.750922 | 8.81E-05 | 0.008622 | <0.001 |
| positive regulation of bone resorption                                                                                    | 10 | 12  | 3.713883 | 1.02E-04 | 0.00984  | <0.001 |
| positive regulation of bone remodeling                                                                                    | 10 | 12  | 3.713883 | 1.02E-04 | 0.009695 | <0.001 |
| collagen fibril organization                                                                                              | 36 | 36  | 3.704467 | 1.06E-04 | 0.009916 | <0.001 |
| glomerulus development                                                                                                    | 42 | 44  | 3.624851 | 1.45E-04 | 0.013341 | <0.001 |
| adaptive immune response based on somatic recombination of immune receptors built from immunoglobulin superfamily domains | 91 | 228 | 3.615305 | 1.50E-04 | 0.013648 | <0.001 |
| calcium-activated potassium channel activity                                                                              | 17 | 17  | 3.611891 | 1.52E-04 | 0.013637 | <0.001 |
| phagocytosis                                                                                                              | 62 | 68  | 3.609953 | 1.53E-04 | 0.013551 | <0.001 |
| calcium channel activity                                                                                                  | 88 | 92  | 3.589673 | 1.66E-04 | 0.014452 | <0.001 |
| regulation of calcium ion transport via voltage-gated calcium channel activity                                            | 46 | 47  | 3.578154 | 1.73E-04 | 0.014902 | <0.001 |
| regulation of tissue remodeling                                                                                           | 37 | 40  | 3.553349 | 1.90E-04 | 0.016165 | <0.001 |
| tissue homeostasis                                                                                                        | 78 | 85  | 3.532565 | 2.06E-04 | 0.017264 | <0.001 |
| embryonic limb morphogenesis                                                                                              | 89 | 104 | 3.529207 | 2.08E-04 | 0.01726  | <0.001 |
| embryonic appendage morphogenesis                                                                                         | 89 | 104 | 3.529207 | 2.08E-04 | 0.017042 | <0.001 |
| regulation of homotypic cell-cell adhesion                                                                                | 13 | 14  | 3.515712 | 2.19E-04 | 0.017707 | <0.001 |
| photoreceptor outer segment                                                                                               | 32 | 33  | 3.507113 | 2.26E-04 | 0.018064 | <0.001 |



|                                                  |    |     |          |          |          |        |
|--------------------------------------------------|----|-----|----------|----------|----------|--------|
| MHC protein complex                              | 33 | 46  | 3.496108 | 2.36E-04 | 0.018596 | <0.001 |
| regulation of platelet activation                | 21 | 22  | 3.482246 | 2.49E-04 | 0.01935  | <0.001 |
| acute inflammatory response                      | 54 | 61  | 3.478179 | 2.52E-04 | 0.019412 | <0.001 |
| response to caffeine                             | 12 | 12  | 3.47671  | 2.54E-04 | 0.019289 | <0.001 |
| cyclic-nucleotide phosphodiesterase activity     | 24 | 27  | 3.4661   | 2.64E-04 | 0.019833 | <0.001 |
| transmembrane receptor protein kinase activity   | 76 | 83  | 3.456761 | 2.73E-04 | 0.020297 | <0.001 |
| positive regulation of transporter activity      | 28 | 30  | 3.451965 | 2.78E-04 | 0.020427 | <0.001 |
| sensory perception of temperature stimulus       | 7  | 8   | 3.444503 | 2.86E-04 | 0.020763 | <0.001 |
| 3,5-cyclic-nucleotide phosphodiesterase activity | 23 | 26  | 3.443682 | 2.87E-04 | 0.020595 | <0.001 |
| cytosolic calcium ion transport                  | 35 | 38  | 3.443463 | 2.87E-04 | 0.020385 | <0.001 |
| epithelial cell proliferation                    | 45 | 50  | 3.433255 | 2.98E-04 | 0.020938 | <0.001 |
| Rho guanyl-nucleotide exchange factor activity   | 71 | 75  | 3.431285 | 3.00E-04 | 0.020864 | <0.001 |
| voltage-gated sodium channel complex             | 13 | 14  | 3.407591 | 3.28E-04 | 0.02252  | <0.001 |
| sodium channel complex                           | 13 | 14  | 3.407591 | 3.28E-04 | 0.022283 | <0.001 |
| positive regulation of cell-substrate adhesion   | 48 | 51  | 3.386791 | 3.54E-04 | 0.023793 | <0.001 |
| sterol transport                                 | 38 | 41  | 3.376995 | 3.66E-04 | 0.024402 | <0.001 |
| cholesterol transport                            | 38 | 41  | 3.376995 | 3.66E-04 | 0.024153 | <0.001 |
| acute-phase response                             | 37 | 42  | 3.360967 | 3.88E-04 | 0.025341 | <0.001 |
| regulation of lipase activity                    | 97 | 107 | 3.358244 | 3.92E-04 | 0.025336 | <0.001 |
| excretion                                        | 48 | 50  | 3.329992 | 4.34E-04 | 0.027774 | <0.001 |
| positive regulation of ERK1 and ERK2 cascade     | 77 | 83  | 3.328859 | 4.36E-04 | 0.027614 | <0.001 |

|                                                                                                         |    |    |          |          |          |        |
|---------------------------------------------------------------------------------------------------------|----|----|----------|----------|----------|--------|
| regulation of synapse structure and activity                                                            | 47 | 49 | 3.323742 | 4.44E-04 | 0.027853 | <0.001 |
| protein phosphatase type 2A complex                                                                     | 16 | 19 | 3.313376 | 4.61E-04 | 0.028628 | <0.001 |
| cAMP metabolic process                                                                                  | 31 | 32 | 3.304465 | 4.76E-04 | 0.029272 | <0.001 |
| regulation of dendrite development                                                                      | 55 | 57 | 3.301381 | 4.81E-04 | 0.029317 | <0.001 |
| heparan sulfate proteoglycan metabolic process                                                          | 18 | 21 | 3.299158 | 4.85E-04 | 0.029274 | <0.001 |
| phosphoric diester hydrolase activity                                                                   | 91 | 98 | 3.297083 | 4.88E-04 | 0.029218 | <0.001 |
| calcium ion transport into cytosol                                                                      | 34 | 37 | 3.290452 | 5.00E-04 | 0.029641 | <0.001 |
| positive regulation of ion transmembrane transporter activity                                           | 22 | 23 | 3.287474 | 5.05E-04 | 0.029684 | <0.001 |
| positive regulation of protein ubiquitination involved in ubiquitin-dependent protein catabolic process | 7  | 7  | 3.281417 | 5.16E-04 | 0.030056 | <0.001 |
| negative regulation of phosphorylation                                                                  | 81 | 85 | 3.279335 | 5.20E-04 | 0.030008 | <0.001 |
| voltage-gated sodium channel activity                                                                   | 14 | 15 | 3.26874  | 5.40E-04 | 0.030879 | <0.001 |
| MHC class II receptor activity                                                                          | 8  | 11 | 3.25891  | 5.59E-04 | 0.031688 | <0.001 |
| integrin-mediated signaling pathway                                                                     | 70 | 72 | 3.256359 | 5.64E-04 | 0.031696 | <0.001 |
| positive regulation of cell growth                                                                      | 78 | 87 | 3.247585 | 5.82E-04 | 0.032408 | <0.001 |

**Table S15.** Combined *P* value estimation for ICSNPathway and GSA-SNP by Fisher Stastatics

| Candidate pathway | Description                    | ICSNPathway      |         | GSA-SNP  |         | Combined P value by Fisher's method |
|-------------------|--------------------------------|------------------|---------|----------|---------|-------------------------------------|
|                   |                                | Nominal <i>P</i> | FDR     | <i>P</i> | FDR     |                                     |
| GO:0001750        | Photoreceptor outer segment    | < 0.001          | < 0.001 | 2.26E-04 | < 0.001 | 3.68E-06                            |
| GO:0043498        | Cell surface binding           | < 0.001          | < 0.001 | 2.88E-05 | < 0.001 | 5.3E-07                             |
| GO:0015485        | Cholesterol binding            | < 0.001          | < 0.001 | 2.27E-08 | < 0.001 | < 0.001                             |
| GO:0051635        | Bacterial cell surface binding | < 0.001          | < 0.001 | 9.16E-14 | < 0.001 | < 0.001                             |

## Supplementary Figures

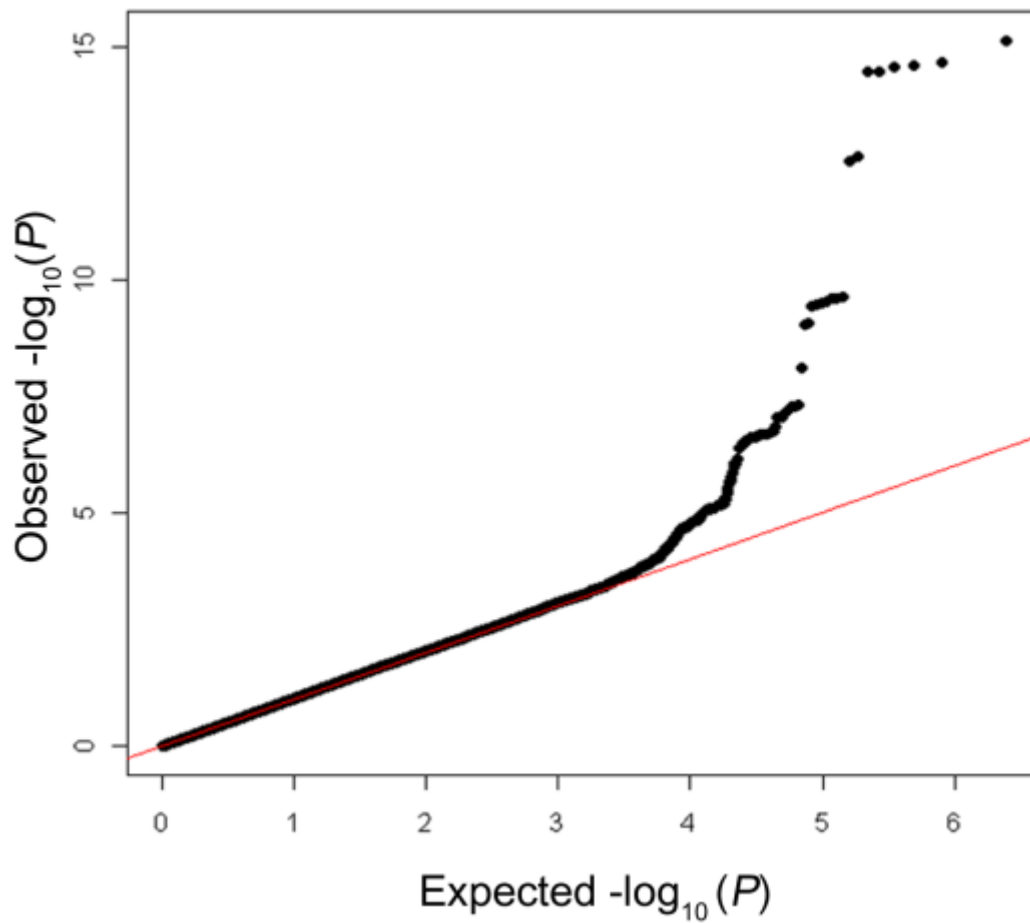

**Figure S1.** A Quantile–Quantile plot of  $P$ -values in the GWAS for serum CRP levels (stage 1). The horizontal axis indicates the expected  $-\log_{10}(P)$ -values. The vertical axis indicates the observed  $-\log_{10}(P)$ -values). The red line represents  $y=x$ .

A

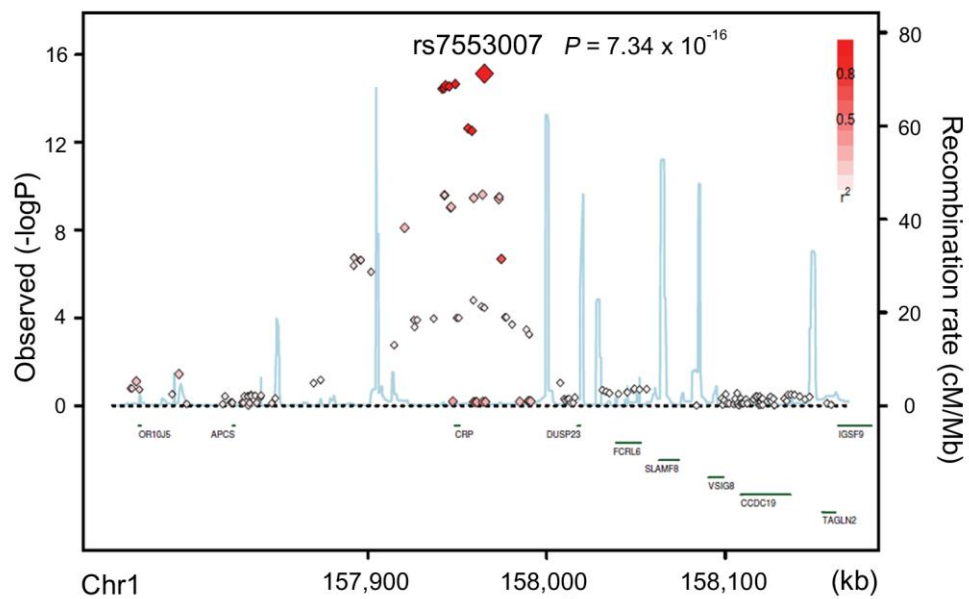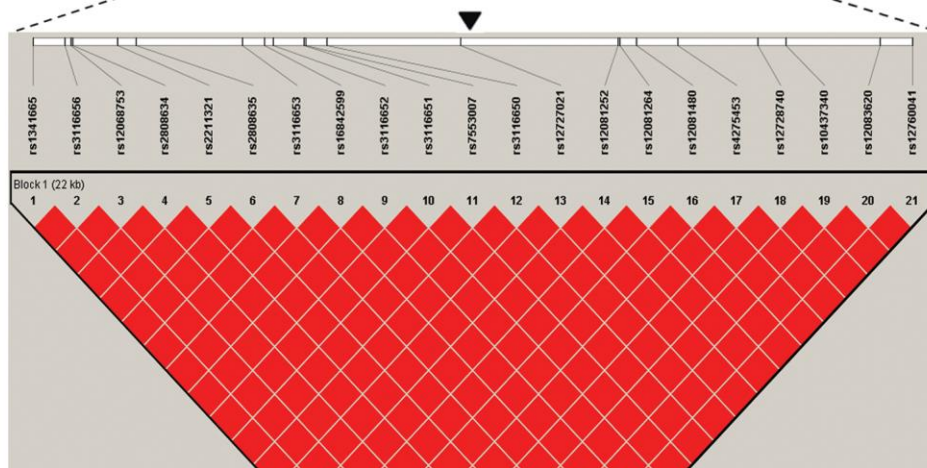

**B**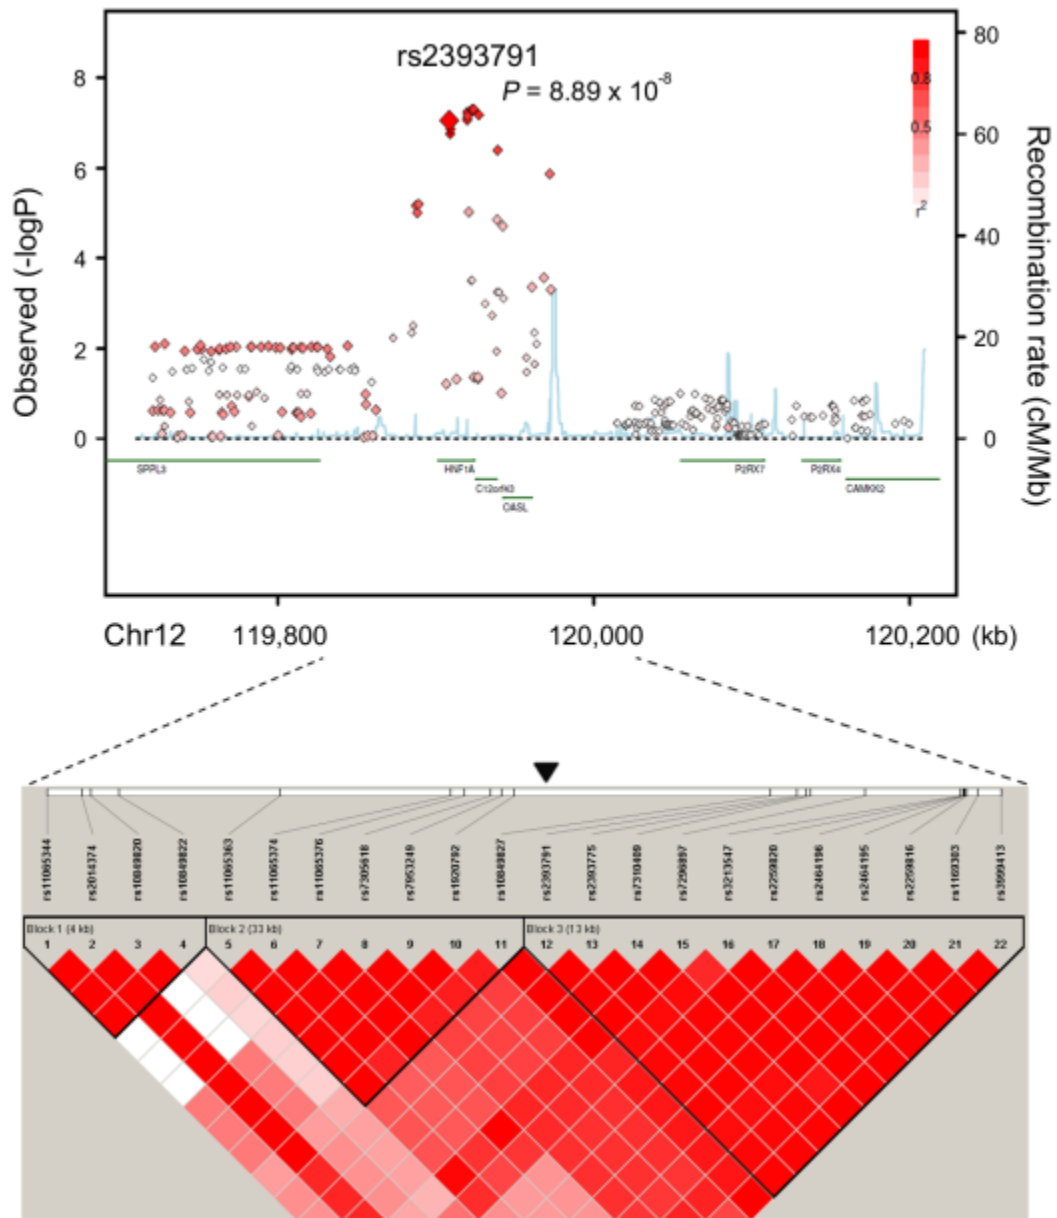

**Figure S2.** (A) Stage 1 data showing a regional association (upper panel) and linkage disequilibrium (LD; lower panel) plots of the *CRP* locus around rs7553007. Arrow head represents rs7553007. (B) Stage 1 data showing a regional association (upper panel) and linkage disequilibrium (LD; lower panel) plots of the *HNF1A* locus around rs2393791. Arrow head represents rs2393791.

## This study

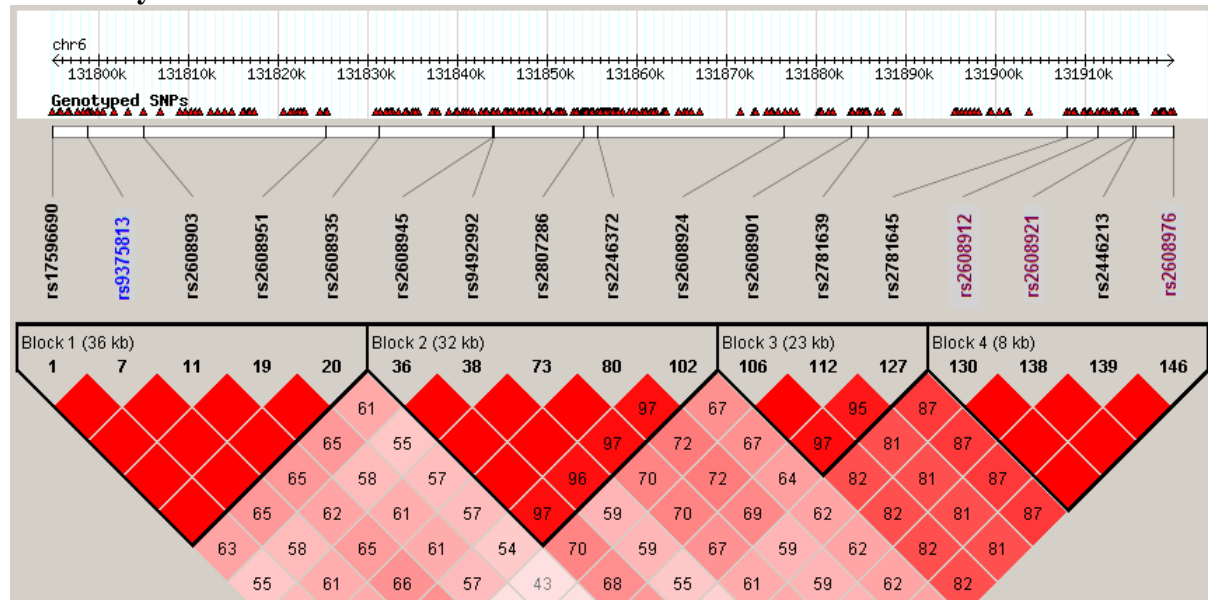

## CHB+JPT

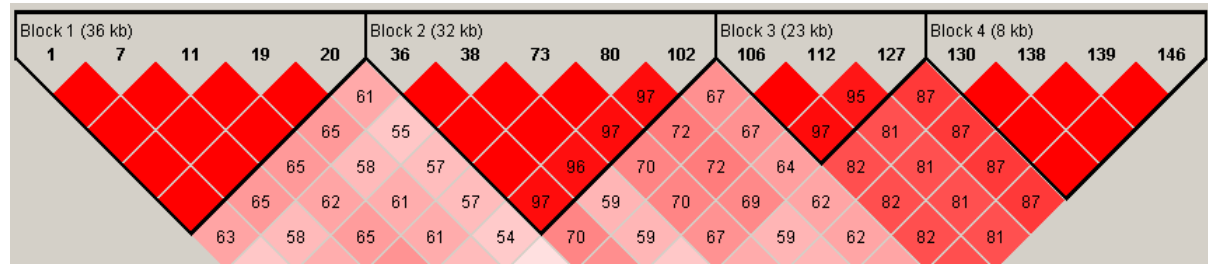

## CEU

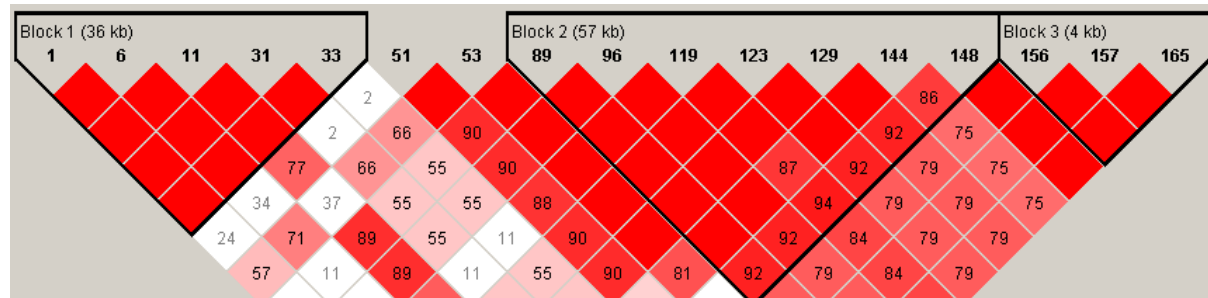

## YRI

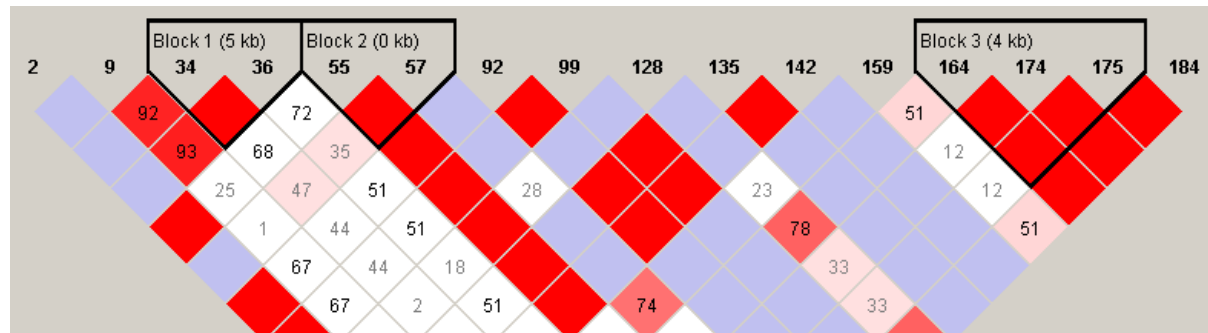

**Figure S3.** Pairwise linkage disequilibrium (LD) between the selected SNPs in *ARG1* locus around rs9375813. LD plots for Korea population were drawn using the genotype data from the present study, whereas LD plots for Japanese, Chinese, Europeans and Africans were made from genotype data from HapMap Stage 2. Blue ID indicates the most significant SNP. Purple ID indicates the SNPs whose rank got elevated after re-prioritization.

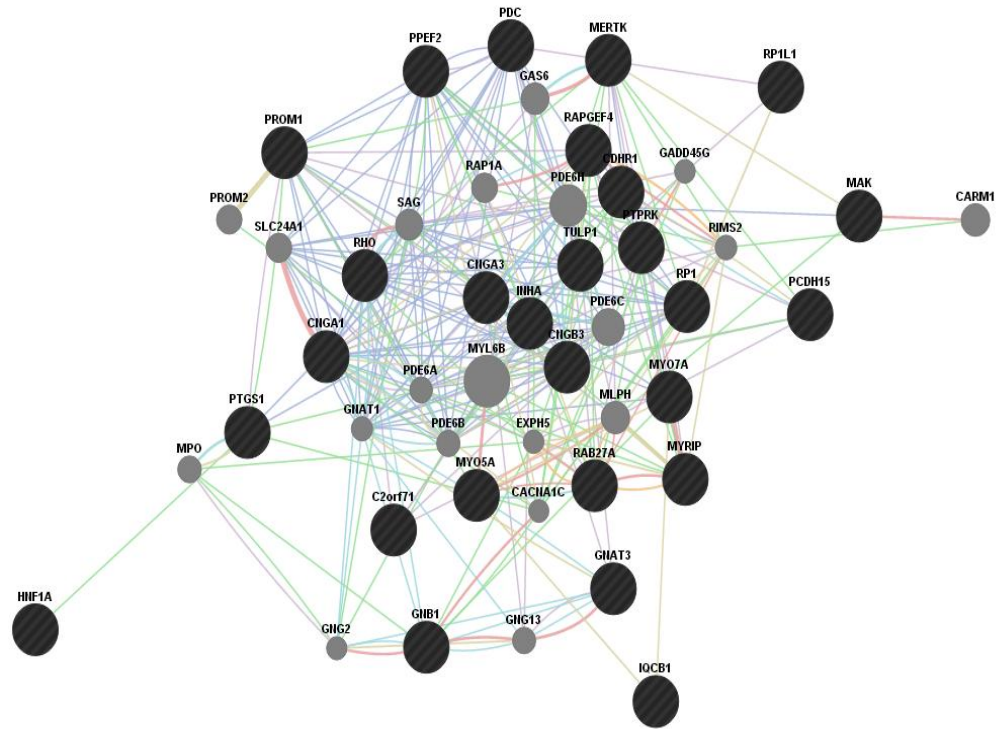

**Figure S4.** Gene network of photoreceptor outer segment pathway by GeneMANIA analysis. Using the genes identified from pathway analysis, GeneMANIA network analysis was performed. Query genes are depicted as black nodes and discovered genes are depicted as gray nodes. Edges show different interactions among genes; purple indicates for co-expression; light-blue indicates for pathway; dark yellow indicates for shared protein domains; red indicates for physical interactions; dark blue indicates for co-localization; green indicates for genetic interactions. Node sizes are determined according to their weight in the network.



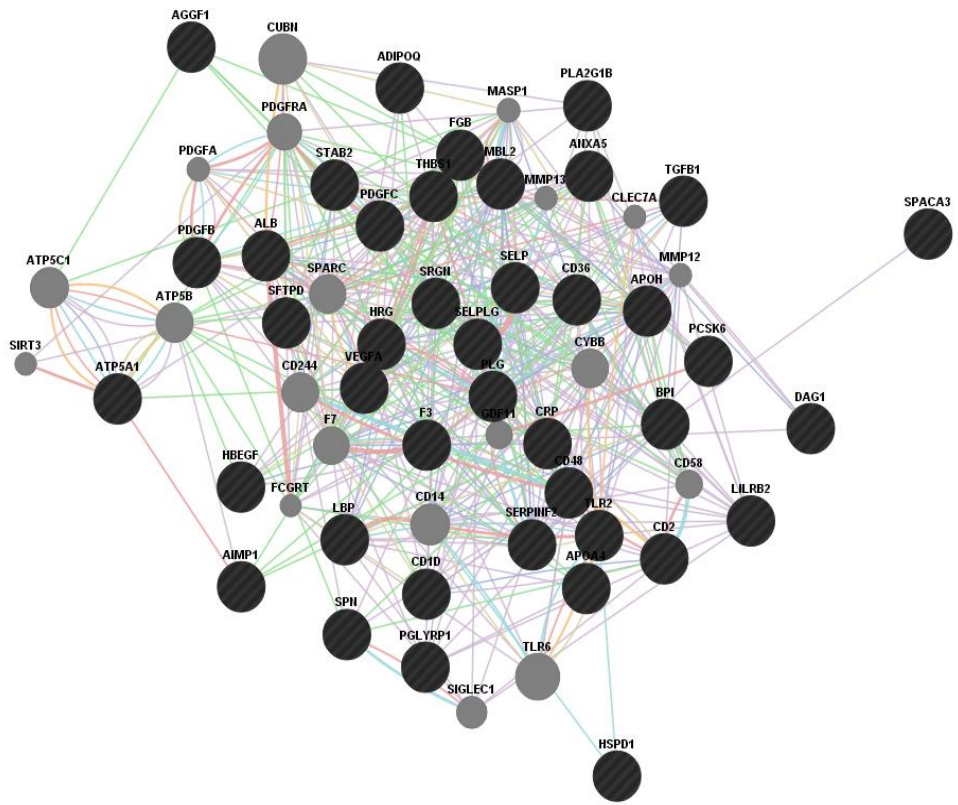

**Figure S5.** Gene network of cell surface binding pathway by GeneMANIA.

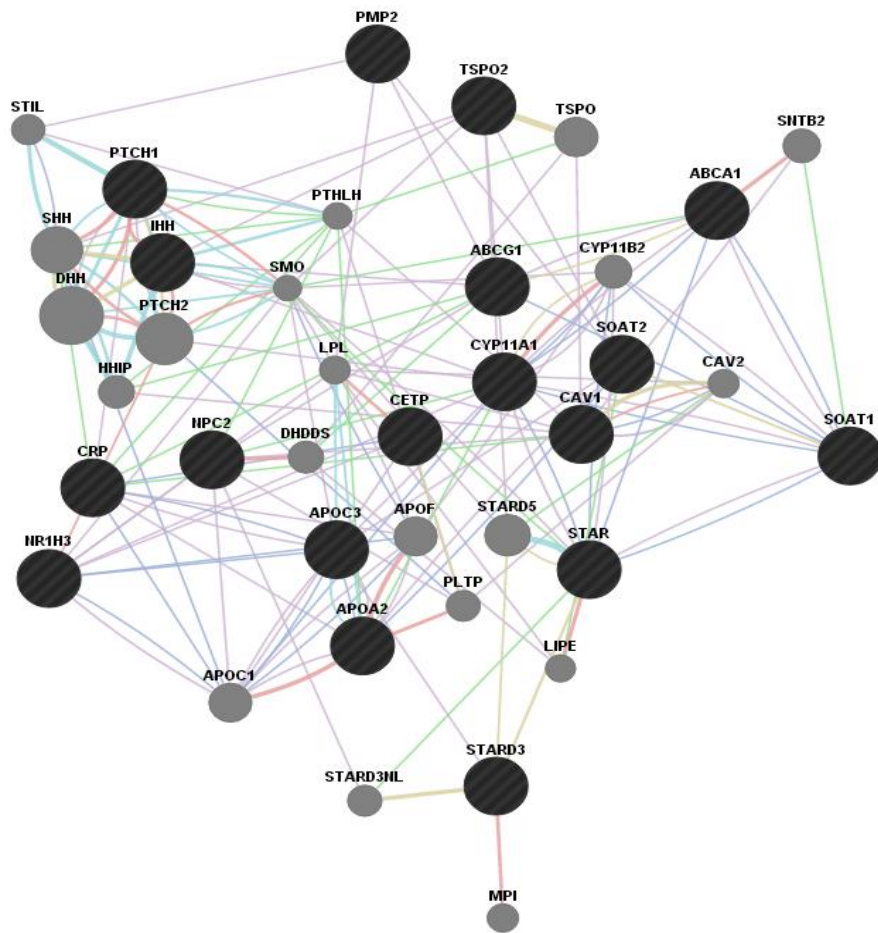

**Figure S6.** Gene network of cholesterol binding pathway by GeneMANIA.

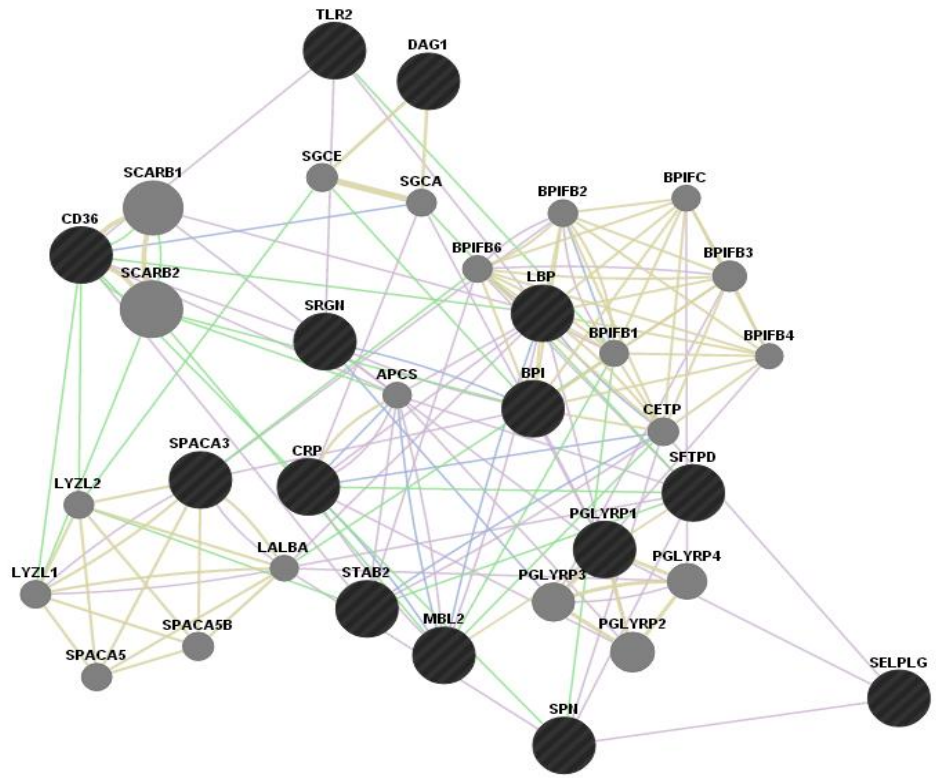

**Figure S7.** Gene network of bacterial cell surface binding pathway by GeneMANIA.
